# Supplementary material for: Epidemiology of injuries, treatment (costs) and outcome in burn patients admitted to a hospital with or without dedicated burn centre (Burn-Pro): protocol for a multicentre prospective observational study
Source: PubMed Central journal article supplement — BMJ Open. 2018 Nov 15;8(11):e023709. doi: 10.1136/bmjopen-2018-023709 (PMC6252702; doi:10.1136/bmjopen-2018-023709), 2018-11-15
Supplement: bmjopen-2018-023709.draft_revisions.pdf [file bmjopen-2018-023709.draft_revisions.pdf]

# BMJ Open

BMJ Open is committed to open peer review. As part of this commitment we make the peer review history of every article we publish publicly available.

When an article is published we post the peer reviewers' comments and the authors' responses online. We also post the versions of the paper that were used during peer review. These are the versions that the peer review comments apply to.

The versions of the paper that follow are the versions that were submitted during the peer review process. They are not the versions of record or the final published versions. They should not be cited or distributed as the published version of this manuscript.

BMJ Open is an open access journal and the full, final, typeset and author-corrected version of record of the manuscript is available on our site with no access controls, subscription charges or pay-per-view fees (<http://bmjopen.bmj.com>).

If you have any questions on BMJ Open's open peer review process please email [info.bmjopen@bmj.com](mailto:info.bmjopen@bmj.com)

# BMJ Open

## Epidemiology of injuries, treatment (costs), and outcome in burn patients admitted to a hospital with or without dedicated Burn Center (Burn-Pro); Protocol for a multicenter prospective observational study

|                               |                                                                                                                                                                                                                                                                                                                                                                                                                                                                                                                                                                                                                                                                                                                                                                                                                                                                                                                                                                                                                                                                                                                                                                                                                                                                                                                                                                                                                                                                                                                                                                                                                                                              |
|-------------------------------|--------------------------------------------------------------------------------------------------------------------------------------------------------------------------------------------------------------------------------------------------------------------------------------------------------------------------------------------------------------------------------------------------------------------------------------------------------------------------------------------------------------------------------------------------------------------------------------------------------------------------------------------------------------------------------------------------------------------------------------------------------------------------------------------------------------------------------------------------------------------------------------------------------------------------------------------------------------------------------------------------------------------------------------------------------------------------------------------------------------------------------------------------------------------------------------------------------------------------------------------------------------------------------------------------------------------------------------------------------------------------------------------------------------------------------------------------------------------------------------------------------------------------------------------------------------------------------------------------------------------------------------------------------------|
| Journal:                      | <i>BMJ Open</i>                                                                                                                                                                                                                                                                                                                                                                                                                                                                                                                                                                                                                                                                                                                                                                                                                                                                                                                                                                                                                                                                                                                                                                                                                                                                                                                                                                                                                                                                                                                                                                                                                                              |
| Manuscript ID                 | bmjopen-2018-023709                                                                                                                                                                                                                                                                                                                                                                                                                                                                                                                                                                                                                                                                                                                                                                                                                                                                                                                                                                                                                                                                                                                                                                                                                                                                                                                                                                                                                                                                                                                                                                                                                                          |
| Article Type:                 | Protocol                                                                                                                                                                                                                                                                                                                                                                                                                                                                                                                                                                                                                                                                                                                                                                                                                                                                                                                                                                                                                                                                                                                                                                                                                                                                                                                                                                                                                                                                                                                                                                                                                                                     |
| Date Submitted by the Author: | 19-Apr-2018                                                                                                                                                                                                                                                                                                                                                                                                                                                                                                                                                                                                                                                                                                                                                                                                                                                                                                                                                                                                                                                                                                                                                                                                                                                                                                                                                                                                                                                                                                                                                                                                                                                  |
| Complete List of Authors:     | <p>Van Lieshout, Esther M.M.; Erasmus MC, University Medical Center Rotterdam</p> <p>Van Yperen, Daan; Maasstad Ziekenhuis, Burn Center; Erasmus MC, Trauma Research Unit Department of Surgery</p> <p>Van Baar, Margriet; Maasstad Ziekenhuis, Burn Center; Erasmus MC, Department of Public Health</p> <p>Polinder, Suzanne; Erasmus MC, Department of Public Health</p> <p>Boersma, Doeke; Jeroen Bosch Ziekenhuis, Department of Surgery</p> <p>Cardon, Anne; ZorgSaam, Department of Surgery</p> <p>De Rijcke, Piet; IJsselland Ziekenhuis, Department of Surgery</p> <p>Guijt, Marc; Elkerliek Ziekenhuis, Department of Surgery</p> <p>Klem, Taco; Sint Franciscus Gasthuis, Department of Surgery</p> <p>Lansink, Koen; Elisabeth-TweeSteden Ziekenhuis, Department of Surgery</p> <p>Ringburg, Akkie; Ikazia Ziekenhuis, Department of Surgery</p> <p>Staarink, Maarten; Van Weel-Bethesda Ziekenhuis, Department of Surgery</p> <p>Schoot, Leon; Rivas Zorggroep, Department of Surgery</p> <p>van der VEEN, Alexander; Catharina Ziekenhuis, Department of Surgery</p> <p>Van Eijck, Floortje; Bravis ziekenhuis, Department of Surgery</p> <p>Van Eerten, Percy; Maxima Medisch Centrum locatie Veldhoven, Department of Surgery</p> <p>Vegt, Paul; Albert Schweitzer Ziekenhuis, Department of Surgery</p> <p>Vos, DI; Amphia Ziekenhuis, Department of Surgery</p> <p>Waleboerg, Marco; Admiraal De Ruyter Ziekenhuis</p> <p>Verhofstad, Michael; Erasmus MC, University Medical Center Rotterdam, Trauma Surgery</p> <p>Van der Vlies, Cornelis; Maasstad Ziekenhuis, Burn Center; Erasmus MC, Trauma Research Unit Department of Surgery</p> |
| Keywords:                     | <p>Organisation of health services &lt; HEALTH SERVICES ADMINISTRATION &amp; MANAGEMENT, WOUND MANAGEMENT, EPIDEMIOLOGY, HEALTH ECONOMICS, Trauma management &lt; ORTHOPAEDIC &amp; TRAUMA SURGERY, SURGERY</p>                                                                                                                                                                                                                                                                                                                                                                                                                                                                                                                                                                                                                                                                                                                                                                                                                                                                                                                                                                                                                                                                                                                                                                                                                                                                                                                                                                                                                                              |
|                               |                                                                                                                                                                                                                                                                                                                                                                                                                                                                                                                                                                                                                                                                                                                                                                                                                                                                                                                                                                                                                                                                                                                                                                                                                                                                                                                                                                                                                                                                                                                                                                                                                                                              |

1  
2  
3  
4  
5  
6  
7  
8  
9  
10  
11  
12  
13  
14  
15  
16  
17  
18  
19  
20  
21  
22  
23  
24  
25  
26  
27  
28  
29  
30  
31  
32  
33  
34  
35  
36  
37  
38  
39  
40  
41  
42  
43  
44  
45  
46  
47  
48  
49  
50  
51  
52  
53  
54  
55  
56  
57  
58  
59  
60

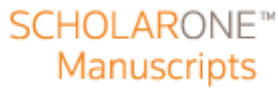

1 **Epidemiology of injuries, treatment (costs), and outcome in burn patients**  
2 **admitted to a hospital with or without dedicated Burn Center (Burn-Pro);**  
3 **Protocol for a multicenter prospective observational study**  
4

5 Esther M.M. Van Lieshout PhD MSc<sup>1A\*</sup>, Daan T. Van Yperen, MD<sup>1,2A</sup>, Margriet E. Van Baar,  
6 PhD<sup>2,3</sup>, Suzanne Polinder PhD<sup>3</sup>, Doeke Boersma MD PhD<sup>4</sup>, Anne Y.M.V.P. Cardon MD<sup>5</sup>,  
7 Piet A.R. De Rijcke MD<sup>6</sup>, Marc Guijt MD<sup>7</sup>, Taco M.A.L. Klem MD PhD<sup>8</sup>, Koen W.W.  
8 Lansink MD PhD<sup>9</sup>, Akkie N. Ringburg MD PhD<sup>10</sup>, Maarten Staarink MD<sup>11</sup>, Leon Van de  
9 Schoot MD<sup>12</sup>, Alexander H. Van der Veen MD PhD<sup>13</sup>, Floortje C. Van Eijck MD PhD<sup>14</sup>,  
10 Percy V. Van Eerten MD<sup>15</sup>, Paul A. Vegt MD PhD<sup>16</sup>, Dagmar I. Vos MD PhD<sup>17</sup>, Marco  
11 Waleboer MD<sup>18</sup>, Michael H.J. Verhofstad MD PhD<sup>1</sup>, Cornelis H. Van der Vlies, MD PhD<sup>1,2</sup>

12  
13 <sup>1</sup>Trauma Research Unit Department of Surgery, Erasmus MC, University Medical Center  
14 Rotterdam, P.O. Box 2040, 3000 CA Rotterdam, The Netherlands

15 <sup>2</sup>Burn Center, Maastricht Hospital, P.O. Box 9100, 3007 AC Rotterdam, The Netherlands

16 <sup>3</sup>Department of Public Health, Erasmus MC, University Medical Center Rotterdam, P.O. Box  
17 2040, 3000 CA Rotterdam, The Netherlands

18 <sup>4</sup>Department of Surgery, Jeroen Bosch Ziekenhuis, P.O. Box 90153, 5200 ME 's-  
19 Hertogenbosch, The Netherlands

20 <sup>5</sup>Department of Surgery, ZorgSaam Zeeuws-Vlaanderen, 4535 PA Terneuzen, The Netherlands

21 <sup>6</sup>Department of Surgery, IJsselland Ziekenhuis, P.O. Box 690, 2900 AR Capelle aan den  
22 IJssel, The Netherlands

23 <sup>7</sup>Department of Surgery, Elkerliek Ziekenhuis, P.O. Box 58, 5700 AB Helmond, The  
24 Netherlands

- 1  
2  
3 25 <sup>8</sup>Department of Surgery, Franciscus Gasthuis&Vlietland, P.O. Box 10900, 3004 BA  
4  
5 26 Rotterdam, The Netherlands  
6  
7 27 <sup>9</sup>Department of Surgery, Elisabeth TweeSteden Ziekenhuis, P.O. Box 90151, 5000 LC  
8  
9 28 Tilburg, The Netherlands  
10  
11 29 <sup>10</sup>Department of Surgery, Ikazia Ziekenhuis, P.O. Box 5009, 3008 AA Rotterdam, The  
12  
13 30 Netherlands  
14  
15 31 <sup>11</sup>Department of Surgery, Van Weel-Bethesda Ziekenhuis, P.O. Box 153, 3240 AD Dirksland,  
16  
17 32 The Netherlands  
18  
19 33 <sup>12</sup>Department of Surgery, Beatrix Ziekenhuis/Rivas, P.O. Box 90, 4200 AB Gorinchem, The  
20  
21 34 Netherlands  
22  
23 35 <sup>13</sup>Department of Surgery, Catharina Ziekenhuis, P.O. Box 1350, 5602 ZA Eindhoven, The  
24  
25 36 Netherlands  
26  
27 37 <sup>14</sup>Department of Surgery, Bravis Ziekenhuis, P.O. Box 999, 3008 AZ Roosendaal, The  
28  
29 38 Netherlands  
30  
31 39 <sup>15</sup>Department of Surgery, Máxima Medisch Centrum, P.O. Box 7777, 5500 MB Veldhoven,  
32  
33 40 The Netherlands  
34  
35 41 <sup>16</sup>Department of Surgery, Albert Schweitzer Ziekenhuis, P.O. Box 444, 3300 AK Dordrecht,  
36  
37 42 The Netherlands  
38  
39 43 <sup>17</sup>Department of Surgery, Amphia Ziekenhuis, P.O. Box 90158, 4800 RK Breda, The  
40  
41 44 Netherlands  
42  
43 45 <sup>18</sup>Department of Surgery, Admiraal De Ruyter Ziekenhuis, P.O. Box 15, 4460 AA Goes, The  
44  
45 46 Netherlands  
46  
47  
48  
49  
50  
51  
52 48 <sup>A</sup> Both authors contributed equally; <sup>\*</sup> Corresponding author  
53  
54  
55 49  
56  
57  
58  
59  
60

1  
2  
3 50 Email addresses:  
4  
5 51 EMMVL: e.vanlieshout@erasmusmc.nl  
6  
7 52 DTVY: yperend@maasstadziekenhuis.nl; d.vanyperen@erasmusmc.nl  
8  
9 53 MEVB: baarm@maasstadziekenhuis.nl  
10  
11 54 SP: s.polinder@erasmusmc.nl  
12  
13 55 DB: d.boersma@jbz.nl  
14  
15 56 AYMVPC: a.cardon@zzv.nl  
16  
17 57 PARDR: pdrijcke@ysl.nl  
18  
19 58 MG: mguijt@elkerliek.nl  
20  
21 59 TMALK: t.klem@franciscus.nl  
22  
23 60 KWWL: k.lansink@elisabeth.nl  
24  
25 61 ANR: a.ringburg@ikazia.nl  
26  
27 62 MS: m.staarink@vanweelbethesda.nl  
28  
29 63 LVDS: l.van.de.schoot@rivas.nl  
30  
31 64 AHVDV: alexander.vd.veen@catharinaziekenhuis.nl  
32  
33 65 FCVE: f.vaneijck@bravis.nl  
34  
35 66 PVVE: p.vaneerten@mmc.nl  
36  
37 67 PAV: p.a.vegt@asz.nl  
38  
39 68 DIV: dvos@amphia.nl  
40  
41 69 MW: m.waleboer@adrz.nl  
42  
43 70 MHJV: m.verhofstad@erasmusmc.nl  
44  
45 71 CHVDV: vliesc@maasstadziekenhuis.nl; c.vandervlies@erasmusmc.nl  
46  
47  
48  
49  
50  
51  
52  
53  
54  
55  
56  
57  
58  
59  
60

## 73 **Abstract**

### 74 **Introduction**

75 Admission to a Burn Center is indicated for patients with severe burns or with specific  
76 characteristics like older age or comorbidities. The Emergency Management of Severe Burns  
77 (EMSB) referral criteria have been implemented for optimal triaging of burn patients.  
78 Extensive injury and outcome registration exists for patients admitted to a dedicated Burn  
79 Center, but limited information is available about the organization of care and referral of burn  
80 patients presented to a hospital elsewhere. The aims of this study are to compare the burn  
81 injury characteristics, treatment (costs), Quality of Life, and scar quality of burn patients  
82 admitted to a hospital without dedicated Burn Center versus burn patients with <10% Total  
83 Body Surface Area (TBSA) burned who are admitted (or secondarily referred) to a Burn  
84 Center. If these admissions were in agreement with the EMSB referral criteria will also be  
85 determined.

### 86 **Methods and analysis**

87 In this multicenter, prospective, observational study (cohort study), the following two groups  
88 of patients will be followed; 1) All patients (no age limit) admitted with burn-related injuries  
89 to a hospital without a dedicated Burn Center in the Southwest Netherlands or Brabant  
90 Trauma Region ; and 2) All patients (no age limit) with <10% Total Body Surface Area  
91 (TBSA) burned who are primarily admitted (or secondarily referred) to the Burn Center of  
92 Maasstad Hospital. Data on the burn injury characteristics (primary outcome), EMSB  
93 compliance, treatment, treatment costs, and outcome will be collected from the patients'  
94 medical files. At three weeks and at three, six, and 12 months after trauma, patients will be  
95 asked to complete the Quality of Life (EuroQoL-5D; EQ-5D), and the patient-reported part of  
96 the Patient and Observer Scar Assessment Scale (POSAS). At those time visits, the

1  
2  
3 97 coordinating investigator or research assistant will complete the observer-reported part of the  
4  
5 98 POSAS.

6  
7 99 **Ethics and dissemination**

8  
9 100 This study has been exempted by the medical research ethics committee (MREC) Erasmus  
10  
11 101 MC (Rotterdam, The Netherlands). Each participant will provide written consent to  
12  
13 102 participate and remain encoded during the study. The results of the study are planned to be  
14  
15 103 published in an international, peer-reviewed journal.

16  
17 104 **Registration details**

18  
19 105 The study is registered at the Netherlands Trial Register (NTR6565; date 12-jul-2017).  
20  
21  
22 106

23  
24 107 **Keywords**

25  
26 108 Burn; Costs; Epidemiology; Etiology; Outcome; Quality of Life; Referral; Scar; Treatment.  
27  
28 109



1  
2  
3 110 **Article Summary**  
4

5  
6 111 **Strengths and limitations of this study:**  
7

- 8 112 - This study will provide insight into care of burn patients both in hospitals with and  
9  
10 113 without a dedicated Burn Center  
11  
12 114 - It is a prospective, multicenter, observational study with a strong methodological design.  
13  
14 115 - Participation of over 20 participating hospitals will increase the reliability and  
15  
16 116 generalizability of the data  
17  
18 117 - Although the study will be mostly relevant for the Netherlands, it is also informative for  
19  
20 118 other regions.  
21  
22

23 119  
24  
25  
26  
27  
28  
29  
30  
31  
32  
33  
34  
35  
36  
37  
38  
39  
40  
41  
42  
43  
44  
45  
46  
47  
48  
49  
50  
51  
52  
53  
54  
55  
56  
57  
58  
59  
60

## 120 **Introduction**

121 Burns cause significant morbidity and mortality worldwide. Globally, some studies are  
122 available on the epidemiology of Emergency Department (ED) treatments of burn injuries[1-  
123 6]. These studies focus on epidemiology, including incidence rates and trends of burn-related  
124 ED visits[3, 4, 6]. Two international publications have been written, including presentation of  
125 data on ED treatment for burns in the Netherlands[7, 8]. These data were limited to home and  
126 leisure accidents; work-related burn injuries were not included.

127  
128 Depending on the severity, burn injuries may require specialized burn care. Three Dutch Burn  
129 Centers have been established in order to provide specialized burn care to specific patients. In  
130 order to enable proper triaging and referral, the Emergency Management of Severe Burns  
131 (EMSB) referral criteria have been implemented (Table 1)[9]. This should result in optimal  
132 treatment for burn patients.

133  
134 In 2014, 322 patients with burns or inhalation injury were admitted to a hospital in the trauma  
135 region South-West Netherlands. Of these patients, 213 (66%) were admitted to Burn Center  
136 of Maastad Hospital (Rotterdam), the other 109 (34%) were admitted to hospitals without  
137 specialized Burn Center. Whether or not these 109 admissions were in compliance with the  
138 EMSB referral criteria is unknown. Equally important, there is a lack of insight into the  
139 epidemiology, treatment (including treatment costs), and outcome (both clinical results and  
140 Quality and Life) of the patients treated in hospitals without Burn Center. One study is  
141 currently being conducted, in which treatment, Quality of Life, and medical costs of patients  
142 reporting with burn injuries to the Emergency Department is studied[10]. The study  
143 population (N=87) mainly consists of non-admitted patients.

144

1  
2  
3 145 In order to get insight into the epidemiology of burn patients, detailed data collection on  
4  
5 146 patient characteristics, etiology, burn injury characteristics, treatment, and outcome is critical.  
6  
7 147 For that reason, the Dutch Burn Repository (DBR) R3 has been established in 2009[11]. From  
8  
9 148 that date onwards, all patients admitted to a Burn Center in The Netherlands are registered in  
10  
11 149 this Repository. Burn patients admitted elsewhere are not included in the R3 Repository.

12  
13  
14 150

15  
16 151 Three other national registries also do not provide insight into epidemiology, treatment (costs)  
17  
18 152 and outcome including quality of life of all admitted burn patients. The National Injury  
19  
20 153 Surveillance System (in Dutch: Letsel Informatie Systeem, LIS; [www.veiligheid.nl](http://www.veiligheid.nl))[12] and  
21  
22 154 the National Medical Registration (in Dutch: Landelijke Medische Registratie, LMR;  
23  
24 155 [www.dutchhospitaldata.nl](http://www.dutchhospitaldata.nl))[13] register non-admitted and admitted patients, respectively.

25  
26 156 Both are insufficient, as they register patients based on the main diagnosis, which may not  
27  
28 157 always be the burn injury. The Dutch National Trauma Registry (in Dutch: Landelijke  
29  
30 158 Trauma Registratie, LTR; [www.lnaz.nl](http://www.lnaz.nl)) registers all admitted trauma patients. It encodes burn  
31  
32 159 wounds, but with limited detail, and does not contain relevant treatment and outcome data.

33  
34  
35 160

36  
37 161 Based on the above, there are currently no data available that provide sufficient details about  
38  
39 162 patients admitted to a hospital without Burn Center. The main aim of this study is to compare  
40  
41 163 the burn injury characteristics of burn patients admitted to a hospital without dedicated Burn  
42  
43 164 Center versus burn patients with <10% Total Body Surface Area (TBSA) burned who are  
44  
45 165 admitted (or secondarily referred) to a Burn Center. Secondary aims are 1) to determine if  
46  
47 166 these admissions were in agreement with the EMSB referral criteria; and 2) to compare the  
48  
49 167 treatment and direct medical costs between these patient groups, and to compare the Quality  
50  
51 168 of Life (EuroQoL-5D; EQ-5D), and scar quality (Patient and Observer Scar Assessment  
52  
53 169 Scale; POSAS) between these patient groups until 12 months follow-up.

54  
55  
56  
57 170

## 171 **Methods and analyses**

### 172 **Study design**

173 This study will follow a multicenter, prospective, observational study design (*i.e.*, cohort  
174 study). Patients will be recruited from every hospital in two large trauma regions in The  
175 Netherlands, the South-West Netherlands trauma region and Network Emergency Care  
176 Brabant. The Burn Center of Maasstad Hospital is included in the South-West Netherlands  
177 trauma area. The following 18 hospitals in The Netherlands will participate: Admiraal De  
178 Ruyter Ziekenhuis (Goes), Albert Schweitzer Ziekenhuis (Dordrecht), Amphia Ziekenhuis  
179 (Breda), Beatrix Ziekenhuis (Gorinchem), Bravis Ziekenhuis (Roosendaal), Catharina  
180 Ziekenhuis (Eindhoven), Elisabeth-TweeSteden Ziekenhuis (Tilburg), Elkerliek Ziekenhuis  
181 (Helmond), Erasmus MC, University Medical Center (Rotterdam), Franciscus Gasthuis &  
182 Vlietland (Rotterdam), IJsselland Ziekenhuis (Capelle aan de IJssel), Ikazia Ziekenhuis  
183 (Rotterdam), Jeroen Bosch Ziekenhuis ('s-Hertogenbosch), Burn Center Maasstad Hospital  
184 (Rotterdam), Máxima Medisch Centrum (Veldhoven), Van Weel-Bethesda Ziekenhuis  
185 (Dirksland), and ZorgSaam Zeeuws-Vlaanderen (Terneuzen).

186 The study is registered at the Netherlands Trial Register (NTR6565; date 12-jul-2017).

187

### 188 **Recruitment and informed consent**

189 Eligible persons admitted with burn-related injuries (or the parents of pediatric patients) will  
190 be informed about the study as soon as possible after hospital presentation. They may receive  
191 the information at the ED or while admitted at the surgical ward. The local staff will ask  
192 permission to send contact details to the research team. Upon receipt of that permission, a  
193 local contact person in the participating hospital will provide details of the patient to the  
194 research team. The coordinating investigator or research assistant will contact the patient (or  
195 parents) to explain the study, and will send the information brochure and informed consent

1  
2  
3 196 form. The coordinating investigator or a research assistant will attend the patient's outpatient  
4  
5 197 visit in the hospital (at approximately three weeks after admission) in order to further explain  
6  
7 198 the study, answer any question the patient (or parents) may have, and for signing informed  
8  
9 199 consent. This gives patients on average two to three weeks to consider their participation. As  
10  
11 200 data collection also includes investigation of the TBSA and extent of burn wounds, it is not  
12  
13 201 possible to give patients more time to consider their participation.

14  
15 202 In order to reduce bias as much as possible, the follow-up measurements by the  
16  
17 203 clinical investigator or research assistant will be performed using a standardized protocol.  
18  
19

20  
21 204

### 22 205 **Study population**

23  
24 206 The study population will consist of a group of patients admitted to a hospital without  
25  
26 207 dedicated burn center or who are admitted to a dedicated burn center. In order to be eligible to  
27  
28 208 participate in this study, a subject must meet all of the following criteria:

29  
30 209 1) Patients with burn-related injuries (no age limit), admitted to a hospital without dedicated

31  
32 210 Burn Center in the trauma regions South-West Netherlands or Brabant; or patients with

33  
34 211 <10% TBSA burned, who are primarily admitted or secondarily referred to the Burn

35  
36 212 Center of Maastad Hospital\*

37  
38 213 2) Provision of informed consent

39  
40 214 \* 10% has been chosen as we expect that patients admitted outside the Burn Centers will have

41  
42 215 no more than 10% TBSA burned.  
43  
44  
45

46 216

47  
48 217 A potential subject who meets any of the following criteria will be excluded from

49  
50 218 participation in this study:

51  
52 219 1) Patients who died <24 hours due to severity of non-burn injuries

53  
54 220 2) Patients with incomplete or unknown contact information  
55  
56  
57  
58  
59  
60

1  
2  
3 221 3) Insufficient comprehension of the Dutch or English language to understand the  
4  
5 222 questionnaires

6  
7 223

8  
9 224 **Outcome measures**

10  
11 225 The burn-related injury pattern will serve as primary outcome measure. Information on the  
12  
13 226 following items will be collected from the patients' medical files:

- 14  
15 227 - Burn etiology (scald, flame, contact, chemical, or other)  
16  
17 228 - Inhalation injury (yes or no)  
18  
19 229 - Setting (home, work, or other)  
20  
21  
22 230 - Body regions burned, severity (% TBSA burned)  
23  
24 231 - Extent of burns (superficial dermal, deep dermal, or subdermal)

25  
26 232

27  
28 233 The secondary outcome measures are:

- 29  
30 234 1) Compliance with EMSB referral criteria (yes or no)  
31  
32 235 2) Treatment  
33  
34 236 3) Health care use in hospital with associated treatment costs  
35  
36 237 4) Health-Related Quality of life (EuroQol-5D-3L (EQ-5D-3L))  
37  
38 238 5) Patient and Observer Scar Assessment Scale (POSAS)

39  
40 239

41  
42  
43 240 The following treatment characteristics will be collected:

- 44  
45 241 - Prehospital transport (ambulance, helicopter emergency medical services, or other  
46  
47 242 - Level of trauma care (level 1, 2, or 3)  
48  
49 243 - Required care (ward or Intensive Care Unit)  
50  
51 244 - Resuscitation (amount of fluid <24h after admission)  
52  
53 245 - Intubation (yes or no)  
54  
55  
56  
57  
58  
59  
60

1  
2  
3  
4  
5  
6  
7  
8  
9  
10  
11  
12  
13  
14  
15  
16  
17  
18  
19  
20  
21  
22  
23  
24  
25  
26  
27  
28  
29  
30  
31  
32  
33  
34  
35  
36  
37  
38  
39  
40  
41  
42  
43  
44  
45  
46  
47  
48  
49  
50  
51  
52  
53  
54  
55  
56  
57  
58  
59  
60

- 246 - Bronchoscopy (yes or no)
- 247 - Wound treatment (wound dressing, topical therapy, or other)
- 248 - Date of the first operation
- 249 - Escharotomy (yes or no)
- 250 - Type of operation (split skin grafting, full thickness skin grafting, or excision and
- 251 primary closure)
- 252 - % TBSA that needed skin grafting
- 253 - Expansion of split skin graft (1:1, 1:1.5, 1:3, or 1:6)
- 254 - Total number of operations
- 255 - Indication for second, third, and any subsequent operation
- 256 - Number of outpatient department visits
- 257 - Date of discharge from hospital
- 258 - Reconstructive surgery (release/excision with split skin grafting, full thickness grafting,
- 259 or laps)

260

261 In order to determine the treatment costs, the use of hospital resources will be collected from  
262 medical files directly. All direct medical costs due to treatment, complications, and events  
263 during follow-up (*e.g.*, ED visit, diagnostic work-up, therapy, events, surgery, admissions,  
264 follow-up visits) will be collected. The economic evaluation will be in accordance with the  
265 Dutch guideline and will use cost prices where possible[14]. Medical costs will be calculated  
266 by multiplying the volumes of health care use with the corresponding unit prices.

267

268 The EQ-5D is a validated questionnaire for measuring health-related quality of life[15, 16].  
269 Its use is recommended for the assessment of quality of life in trauma patients, especially for  
270 economic assessments[17, 18]. The EQ-5D-3L descriptive system consists of five dimensions

1  
2  
3 271 of health (mobility, self-care, usual activities, pain/discomfort anxiety/depression), each with  
4  
5 272 three possible answers. Scores are converted to a utility score ranging from zero to one, with  
6  
7 273 lower scores indicating poorer quality of life. The EQ Visual Analog Score (VAS) records the  
8  
9 274 respondents self-rated health status on a vertical (0-100) visual analog scale. Patients aged 16  
10  
11 275 years or older will be asked to complete the EQ-5D themselves. Pediatric patients (<16 years)  
12  
13 276 will be asked to complete the youth version of the EQ-5D, or their parent(s) will be asked to  
14  
15 277 complete a proxy version of the EQ-5D youth version.  
16  
17  
18 278

19  
20 279 The POSAS v2.0 ([www.posas.org](http://www.posas.org))[19] consists of two parts: a Patient Scale and an Observer  
21  
22 280 Scale, which aim to provide a rating of several measured of scar quality (vascularity,  
23  
24 281 pigmentation, relief/texture, thickness, pliability, surface area, pain, and itching/pruritus).  
25  
26 282 Patients aged 16 years or older and parents of younger pediatric patients will complete the  
27  
28 283 patient-reported part, a trained observer will complete the observer-reported part.  
29  
30  
31 284

### 32 33 285 **Other data collected**

34  
35 286 The following, additional, data will be collected in order to describe the study population,  
36  
37 287 patient characteristics, additional injury characteristics, and burn-related (adverse) events:  
38  
39 288 - Patient characteristics: age, gender, American Society of Anesthesiologists (ASA)  
40  
41 289 classification, comorbidities (diabetes or other)  
42  
43 290 - Additional injury characteristics: Injury Severity Score (ISS), Abbreviated Injury Score  
44  
45 291 (AIS), for all nine anatomical regions as registered in the trauma registry)  
46  
47 292 - Burn-related (adverse) events: hematoma (yes or no), excessive blood loss (requiring  
48  
49 293 blood transfusion), wound infection (requiring antibiotic and/or surgical treatment) (yes  
50  
51 294 or no), pneumonia (yes or no), graft loss requiring surgical intervention (or vac therapy;  
52  
53 295 yes or no), or other.  
54  
55  
56  
57  
58  
59  
60



1  
2  
3 296 - Outcome related variables: duration of hospital admission, time to wound closure  
4  
5 297 (calculated from date of admission and date of last wound dressing), percentage graft take  
6  
7 298 5-7 days post burn, discharge destination (home, other hospital, Burn Center,  
8  
9 299 rehabilitation facility, or other), and mortality (possibly burn-related yes or no)  
10

11 300

### 13 301 **Study procedures**

15 302 Patients will be followed for one year, with visits planned at three weeks (window 2-4  
16  
17 303 weeks), three months (window 11-15 weeks), six months (window 5-7 months), and 12  
18  
19 304 months (window 12-14 months) after admission (Table 2). One additional, optional visit is  
20  
21 305 planned at six weeks (window 5-7 weeks) in case the burn wound has not closed at three  
22  
23 306 weeks. The coordinating investigator or research assistant will be present at each outpatient  
24  
25 307 department visit of the enrolled patients for direct collection of data. The study will not  
26  
27 308 interfere with treatment or follow-up.

30 309 Patient characteristics, injury characteristics, and any other relevant data will be  
31  
32 310 collected from the patient's medical files as soon as possible after signing informed consent.  
33  
34 311 Treatment and other clinical data such as adverse events will be collected (partly from the  
35  
36 312 patient files) at each follow-up visit. During these regular clinical visits, any radiographs or  
37  
38 313 digital photos that are routinely obtained will be collected. For the purpose of the study,  
39  
40 314 additional details concerning treatment and outcome that are not mentioned in the patient's  
41  
42 315 hospital files, may be registered on the case report forms directly. At the one-year follow-up  
43  
44 316 visit, the coordinating investigator or research assistant will document any secondary  
45  
46 317 intervention that may be planned for the patient.

49 318 As soon as possible after inclusion, patients will be asked to complete the EQ-5D-3L  
50  
51 319 reflecting their pre-injury quality of life. At three months, six months, and at 12 months after  
52  
53 320 the primary hospital admission, patients (or the parents of pediatric patients) will be asked to  
54  
55

1  
2  
3 321 complete the EQ-5D-3L and the patient-reported part of the POSAS. The coordinating  
4  
5 322 investigator or research assistant will complete the physician-reported part of the POSAS.

6  
7 323

### 8 9 324 **Sample size calculation**

10  
11 325 A formal sample size calculation for this observational study is not constructive. By including  
12  
13 326 all patients treated in the trauma regions South-West Netherlands and Brabant during 18  
14  
15 327 months, as well as all patients with >10% TBSA burned who are primarily admitted or  
16  
17 328 secondarily referred to a Burn Center, the maximum number of inclusions will be achieved.  
18  
19 329 The larger the number of patients, the more reliable the analysis will be. Enrolling all patients  
20  
21 330 possible will result in the highest reliability of data (*i.e.*, accurate point estimate with lowest  
22  
23 331 possible variance). Based on the data in the annual report of Trauma Center South-West  
24  
25 332 Netherland (*i.e.*, 109 patients admitted outside the Burn Center in the year 2014), we expect to  
26  
27 333 include approximately 300 patients in 18 months in the two trauma regions combined.  
28  
29 334

### 30 31 32 33 335 **Statistical analysis**

34  
35 336 Data will be analyzed using the Statistical Package for the Social Sciences (SPSS) version  
36  
37 337 21.0 or higher (SPSS, Chicago, Ill., USA) and will be reported following the Strengthening  
38  
39 338 the Reporting of Observational studies in Epidemiology (STROBE) guidelines. Missing  
40  
41 339 values will not be replaced by imputation. Normality of continuous data will be tested with  
42  
43 340 the Shapiro-Wilk test, and homogeneity of variances will be tested using the Levene's test. A  
44  
45 341 p-value <0.05 will be taken as threshold of statistical significance in all statistical tests, and all  
46  
47 342 tests will be two-sided. No interim analysis is planned.

48  
49 343 First, descriptive analysis will be performed in order to report the outcome measures  
50  
51 344 and other collected data. For continuous data (*e.g.*, EQ-5 and POSAS, the mean and SD  
52  
53 345 (parametric data) or the median and quartiles (non-parametric data) will be reported. The only  
54  
55 346 exception are cost data, these will be reported as mean with 95% confidence interval (95%

1  
2  
3 347 CI). The 95% CI around the mean costs will be approximated by nonparametric  
4  
5 348 bootstrapping. For categorical data (*e.g.*, EMSB compliance), the number and frequencies will  
6  
7 349 be reported. Data will be reported for the entire population as well as separately for the group  
8  
9 350 of patients admitted to a hospital without versus with a Burn Center.

11 351 Next univariate analysis will be done. Statistical significance of difference between the  
12  
13 352 two groups will be tested using a Student's T-test (parametric, continuous data; with or  
14  
15 353 without equal variance assumed as applicable), Mann-Whitney U-test (non-parametric,  
16  
17 354 continuous data), or Chi-squared or Fisher's Exact test (categorical data, as applicable).

20 355 Subgroups will be determined based on the patients included. Relevant subgroups can  
21  
22 356 be children versus adults versus elderly, subgroups with different percentages TBSA burned,  
23  
24 357 or patients admitted in compliance versus disagreement with the EMSB referral criteria.  
25  
26 358 Should formal testing between the latter two subgroups be feasible, this will be done as  
27  
28 359 described above.

31 360 The economic evaluation will include costs for health care. Direct and indirect,  
32  
33 361 medical and non-medical cost will be measured as indicated in the Dutch guidelines for  
34  
35 362 economic evaluations, using standard, published cost prices where possible[14].

37 363

## 364 **Ethics and dissemination**

365 This study will be conducted according to the principles of the Declaration of Helsinki (64<sup>th</sup>  
366 World Medical Association General Assembly, Fortaleza, Brazil, October 2013). Data will  
367 encoded and stored in a pass-word protected OpenClinica database with restricted access to  
368 the researchers only. Data will be entered ones. Quality of the entered data will be monitored  
369 by checking entry for a random sample of patients prior to database locking.

370 This study has been exempted by the medical research ethics committee (MREC)  
371 Erasmus MC (Rotterdam, The Netherlands). This MREC acts as central ethics committee for  
372 this trial (reference number MEC-2017-356). Approval has been obtained from the local  
373 hospital boards in all participating centers. Following review of the protocol (version 1.0 date  
374 22-may-2017, the MREC concluded that this study is not subject to the Medical Research  
375 Involving Human Subjects Act (WMO). They concluded that the study is a medical/scientific  
376 research, but no patients are subjected to procedures or are required to follow rules of  
377 behavior. Consequently, the statutory obligation to provide insurance for subjects  
378 participating in medical research (article 7 of the WMO) does not apply. Any important  
379 changes in the protocol will be submitted to the accredited MREC. The results of the study  
380 are planned to be published in an international, peer reviewed journal and presented at  
381 national and international trauma and burn care meetings. Each participating center will  
382 provide a group author to every publication. No personal data of study participants will be  
383 presented.

384

1  
2  
3 385 **Discussion**  
4

5 386 Burns cause significant morbidity and mortality worldwide, and depending on the severity,  
6  
7 387 burn injuries may require specialized burn care in a dedicated Burn Centers. In order to enable  
8  
9 388 optimal triaging and referral to a Burn Center, the EMSB referral criteria have been  
10  
11 389 implemented[9]. Whereas extensive injury and outcome registration exists for patients  
12  
13 390 admitted to a dedicated Burn Center, there are currently no data available that provide  
14  
15 391 sufficient details about patients admitted to a hospital without Burn Center. Successful  
16  
17 392 completion of this study will provide more insight into the percentage of patients admitted to  
18  
19 393 a hospital without dedicated Burn Center. It will also provide us detailed data on patient and  
20  
21 394 injury characteristics, EMSB compliance, treatment, treatment costs, relevant outcome data,  
22  
23 395 and quality of life of burn patients with primary admission at a hospital without Burn Center  
24  
25 396 as well as patients with <10% TBSA burned who are secondarily referred to a Burn Center.  
26  
27 397 Twenty-one hospitals will participate. Inclusion has started September 18, 2017, and a total of  
28  
29 398 39 patients have been included so far. Eighteen months are planned for inclusion. With a  
30  
31 399 follow-up of one year the presentation of data will be expected by the end of 2020.  
32  
33  
34  
35

36 400  
37  
38  
39  
40  
41  
42  
43  
44  
45  
46  
47  
48  
49  
50  
51  
52  
53  
54  
55  
56  
57  
58  
59  
60

## 401 **References**

- 402 1. Akerlund E, Huss FR, Sjoberg F. Burns in Sweden: an analysis of 24,538 cases during  
403 the period 1987-2004. *Burns* 2007;33(1):31-36
- 404 2. DeKoning EP, Hakenewerth A, Platts-Mills TF, Tintinalli JE. Epidemiology of burn  
405 injuries presenting to North Carolina emergency departments in 2006-2007. *Burns*  
406 2009;35(6):776-782
- 407 3. D'Souza AL, Nelson NG, McKenzie LB. Pediatric burn injuries treated in US emergency  
408 departments between 1990 and 2006. *Pediatrics* 2009;124(5):1424-1430
- 409 4. Fagenholz PJ, Sheridan RL, Harris NS, Pelletier AJ, Camargo CA, Jr. National study of  
410 Emergency Department visits for burn injuries, 1993 to 2004. *Journal of burn care &*  
411 *research : official publication of the American Burn Association* 2007;28(5):681-690
- 412 5. Onarheim H, Jensen SA, Rosenberg BE, Guttormsen AB. The epidemiology of patients  
413 with burn injuries admitted to Norwegian hospitals in 2007. *Burns* 2009;35(8):1142-1146
- 414 6. Wasiak J, Spinks A, Ashby K, et al. The epidemiology of burn injuries in an Australian  
415 setting, 2000-2006. *Burns* 2009;35(8):1124-1132
- 416 7. Den Hertog PC, Blankendaal FA, Ten Hag SM. Burn injuries in The Netherlands. *Accid*  
417 *Anal Prev* 2000;32(3):355-364
- 418 8. Van Rijn OJ, Grol ME, Bouter LM, Mulder S, Kester AD. Incidence of medically treated  
419 burns in The Netherlands. *Burns* 1991;17(5):357-362
- 420 9. The Education Committee of the Australian and New Zealand Burn Association.  
421 Emergency management of severe burns (EMSB) course manual, Dutch version. Dutch  
422 Burn Foundation; 2009.
- 423 10. Goei H, Wijnen BFM, Mans S, et al. Optimizing recruitment strategy for follow-up in  
424 patients with a burn related emergency department visit: a feasibility study. Submitted.

- 1  
2  
3 425 11. Dokter J, Vloemans AF, Beerthuizen GI, et al. Epidemiology and trends in severe burns  
4  
5 426 in the Netherlands. *Burns* 2014;40(7):1406-1414
- 6  
7 427 12. Meerding WJ, Polinder S, Lyons RA, et al. How adequate are emergency department  
8  
9 428 home and leisure injury surveillance systems for cross-country comparisons in Europe?  
10  
11 429 *Int J Inj Contr Saf Promot* 2010;17(1):13-22
- 12  
13 430 13. Van der Stegen R, Ploemacher J. Description of methods for statistics by diagnoses in  
14  
15 431 time by using the LMR (1981-2005). The Hague: Statistics Netherlands (CBS). 2009;9
- 16  
17 432 14. Hakkaart-van Roijen L, Van der Linden N, Bouwmans C, Kanters T, Tan SS Van goede  
18  
19 433 zorg verzekerd, BIJLAGE 1: Kostenhandleiding: Methodologie van kostenonderzoek en  
20  
21 434 referentieprijzen voor economische evaluaties in de gezondheidszorg. 2016.
- 22  
23 435 15. Brooks R, Rabin RE, Eds DC: The measurement and valuation of health status using EQ-  
24  
25 436 5D: a European perspective. Europe: Kluwer Academic Publishers; 2003.
- 26  
27 437 16. Lamers LM, Stalmeier PF, McDonnell J, Krabbe PF, Van Busschbach JJ. Measuring the  
28  
29 438 quality of life in economic evaluations: the Dutch EQ-5D tariff. *Ned Tijdschr Geneeskd*  
30  
31 439 2005;149(28):1574-1578
- 32  
33 440 17. Neugebauer E, Bouillon B, Bullinger M, Wood-Dauphinee S. Quality of life after  
34  
35 441 multiple trauma--summary and recommendations of the consensus conference. *Restor*  
36  
37 442 *Neurol Neurosci* 2002;20(3-4):161-167
- 38  
39 443 18. Van Beeck EF, Larsen CF, Lyons RA, et al. Guidelines for the conduction of follow-up  
40  
41 444 studies measuring injury-related disability. *The Journal of trauma* 2007;62(2):534-550
- 42  
43 445 19. Van de Kar AL, Corion LU, Smeulders MJ, et al. Reliable and feasible evaluation of  
44  
45 446 linear scars by the Patient and Observer Scar Assessment Scale. *Plast Reconstr Surg*  
46  
47 447 2005;116(2):514-522
- 48  
49 448
- 50  
51  
52  
53  
54  
55  
56  
57  
58  
59  
60

## 449 **List of abbreviations used**

450 AIS, Abbreviated Injury Scale; ASA classification, American Society of Anesthesiologists  
451 classification; 95%CI, 95% Confidence Interval; DBR R3, Dutch Burn Repository R3; ED,  
452 Emergency Department; EMSB, The Emergency Management of Severe Burns; EQ-5D,  
453 EuroQoL-5D; ISS, Injury Severity Score; LIS, Letsel Informatie Systeem (in English:  
454 National Injury Surveillance System); LMR, Landelijke Medische Registratie (in English:  
455 National Medical Registration); LNAZ, Landelijke Netwerk Acute Zorg (in English: National  
456 Network Acute Care); LTR, Landelijke Trauma Registratie (in English: National Trauma  
457 Registry); MEC, Medisch Ethische Commissie (in English: Medical Research Ethics  
458 Committee (MREC); NTR, Nederlands Trial Register (in English; Netherlands National Trial  
459 Register); POSAS, Patient and Observer Scar Assessment Scale; QoL, Quality of Life; SD,  
460 Standard Deviation; SPSS, Statistical Package for the Social Sciences; STROBE,  
461 STrengthening the Reporting of OBservational studies in Epidemiology; TBSA, Total Body  
462 Surface Area; VAS, Visual Analog Scale; WMO, Medical Research Involving Human  
463 Subjects Act (in Dutch: Wet Medisch-wetenschappelijk Onderzoek met Mensen).

## 465 **Competing interests**

466 The authors declare that they have no competing interests.

## 468 **Authors' contributions**

469 CHVDV, DTVY, MVB, SP, EMMV and MJHV developed the study. DTVY and EMMVL  
470 drafted the manuscript. MHJV will act as trial principal investigator. DTVY, DB, AYMVPC,  
471 PARDR, MG, TMALK, KWVL, ANR, MS, LVDS, AHVDV, FCVE, PVVE, PAV, DIV,  
472 MW, CHVD and MHJV will participate in patient inclusion and outcome assessment. DTVY



1  
2  
3 473 and EMMVL will perform statistical analysis of the study data. All authors have read and  
4  
5 474 approved the final manuscript.

6  
7 475

## 8 9 476 **Funding statement**

10  
11  
12 477 This research received a specific grant from the Association of the Dutch Burn Centers  
13  
14 478 (ADBC; Beverwijk, The Netherlands; reference number WO/16.110).

15  
16 479

## 17 18 19 480 **Competing interests statement**

20  
21 481 The authors declare that they have no competing interests.  
22  
23  
24  
25  
26  
27  
28  
29  
30  
31  
32  
33  
34  
35  
36  
37  
38  
39  
40  
41  
42  
43  
44  
45  
46  
47  
48  
49  
50  
51  
52  
53  
54  
55  
56  
57  
58  
59  
60

482 **Tables**483 **Table 1: EMSB referral criteria**[9]

|     |                                                                                                           |
|-----|-----------------------------------------------------------------------------------------------------------|
| 1)  | The percentage Total Body Surface Area burned (TBSA burned; >10% TBSA in adults or >5% in children)       |
| 2)  | Burns of special areas (face, hands, feet, perineum, genitalia, and major joints)                         |
| 3)  | Full thickness burns >5% TBSA burned                                                                      |
| 4)  | Electrical burns                                                                                          |
| 5)  | Chemical burns                                                                                            |
| 6)  | Burns with associated inhalation injury                                                                   |
| 7)  | Circumferential burns of limbs or chest                                                                   |
| 8)  | Extremes of age (children and elderly)                                                                    |
| 9)  | Pre-existing medical disorders which could complicate management and prolong recovery or effect mortality |
| 10) | Associated trauma                                                                                         |

484

485 **Table 2: Schedule of events**

| Event forms               | Screening | 3 we<br>(2-4 we) | 6 we*<br>(5-7 we) | 3 mo<br>(11-15 we) | 6 mo<br>(6-7 mo) | 12 mo<br>(12-14 mo) |
|---------------------------|-----------|------------------|-------------------|--------------------|------------------|---------------------|
| Screening                 | X         |                  |                   |                    |                  |                     |
| Informed Consent          |           | X                |                   |                    |                  |                     |
| Patient characteristics   |           | X                |                   |                    |                  |                     |
| Injury characteristics    |           | X                |                   |                    |                  |                     |
| Radiology                 |           | X <sup>1</sup>   | X <sup>1</sup>    | X <sup>1</sup>     | X <sup>1</sup>   | X <sup>1</sup>      |
| Digital photo             |           | X <sup>1</sup>   | X <sup>1</sup>    | X <sup>1</sup>     | X <sup>1</sup>   | X <sup>1</sup>      |
| Treatment characteristics |           | X                | X                 | X                  | X                | X                   |
| Outcome details           |           | X                | X                 | X                  | X                | X                   |
| Adverse Events            |           | X                | X                 | X                  | X                | X                   |
| Clinical FU               |           | X                | X                 | X                  | X                | X                   |
| Health Care Consumption   |           | X                | X                 | X                  | X                | X                   |
| EQ-5D                     |           | X <sup>2</sup>   |                   | X                  | X                | X                   |
| POSAS                     |           |                  |                   | X                  | X                | X                   |
| Early withdrawal          |           | **               | **                | **                 | **               | **                  |

486 \*Optional visit; will only take place if wounds are not closed at three weeks.

487 <sup>1</sup>Only if treating surgeon requests these images.488 <sup>2</sup>Asking for EQ-5D pre-burn.

489 \*\* Only at time of withdrawal.

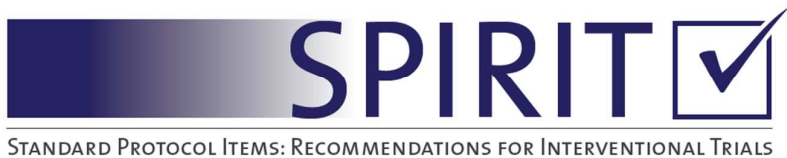

SPIRIT 2013 Checklist: Recommended items to address in a clinical trial protocol and related documents\*

| Section/item                      | Item No | Description                                                                                                                                                                                                                                                                              | Addressed on page number |
|-----------------------------------|---------|------------------------------------------------------------------------------------------------------------------------------------------------------------------------------------------------------------------------------------------------------------------------------------------|--------------------------|
| <b>Administrative information</b> |         |                                                                                                                                                                                                                                                                                          |                          |
| Title                             | 1       | Descriptive title identifying the study design, population, interventions, and, if applicable, trial acronym                                                                                                                                                                             | 1                        |
| Trial registration                | 2a      | Trial identifier and registry name. If not yet registered, name of intended registry                                                                                                                                                                                                     | 5, 9                     |
|                                   | 2b      | All items from the World Health Organization Trial Registration Data Set                                                                                                                                                                                                                 |                          |
| Protocol version                  | 3       | Date and version identifier                                                                                                                                                                                                                                                              | 17                       |
| Funding                           | 4       | Sources and types of financial, material, and other support                                                                                                                                                                                                                              | 22                       |
| Roles and responsibilities        | 5a      | Names, affiliations, and roles of protocol contributors                                                                                                                                                                                                                                  | 1, 2, 3                  |
|                                   | 5b      | Name and contact information for the trial sponsor                                                                                                                                                                                                                                       | 1                        |
|                                   | 5c      | Role of study sponsor and funders, if any, in study design; collection, management, analysis, and interpretation of data; writing of the report; and the decision to submit the report for publication, including whether they will have ultimate authority over any of these activities | 21, 22                   |
|                                   | 5d      | Composition, roles, and responsibilities of the coordinating centre, steering committee, endpoint adjudication committee, data management team, and other individuals or groups overseeing the trial, if applicable (see Item 21a for data monitoring committee)                         | 21, 22                   |

## Introduction

|                          |    |                                                                                                                                                                                                           |         |
|--------------------------|----|-----------------------------------------------------------------------------------------------------------------------------------------------------------------------------------------------------------|---------|
| Background and rationale | 6a | Description of research question and justification for undertaking the trial, including summary of relevant studies (published and unpublished) examining benefits and harms for each intervention        | 4, 7, 8 |
|                          | 6b | Explanation for choice of comparators                                                                                                                                                                     | N.A.    |
| Objectives               | 7  | Specific objectives or hypotheses                                                                                                                                                                         | 4, 8    |
| Trial design             | 8  | Description of trial design including type of trial (eg, parallel group, crossover, factorial, single group), allocation ratio, and framework (eg, superiority, equivalence, noninferiority, exploratory) | 9       |

## Methods: Participants, interventions, and outcomes

|                      |     |                                                                                                                                                                                                                                                                                                                                                                                |                 |
|----------------------|-----|--------------------------------------------------------------------------------------------------------------------------------------------------------------------------------------------------------------------------------------------------------------------------------------------------------------------------------------------------------------------------------|-----------------|
| Study setting        | 9   | Description of study settings (eg, community clinic, academic hospital) and list of countries where data will be collected. Reference to where list of study sites can be obtained                                                                                                                                                                                             | 10              |
| Eligibility criteria | 10  | Inclusion and exclusion criteria for participants. If applicable, eligibility criteria for study centres and individuals who will perform the interventions (eg, surgeons, psychotherapists)                                                                                                                                                                                   | 10, 11          |
| Interventions        | 11a | Interventions for each group with sufficient detail to allow replication, including how and when they will be administered                                                                                                                                                                                                                                                     | 11-15           |
|                      | 11b | Criteria for discontinuing or modifying allocated interventions for a given trial participant (eg, drug dose change in response to harms, participant request, or improving/worsening disease)                                                                                                                                                                                 | N.A.            |
|                      | 11c | Strategies to improve adherence to intervention protocols, and any procedures for monitoring adherence (eg, drug tablet return, laboratory tests)                                                                                                                                                                                                                              | N.A.            |
|                      | 11d | Relevant concomitant care and interventions that are permitted or prohibited during the trial                                                                                                                                                                                                                                                                                  | N.A.            |
| Outcomes             | 12  | Primary, secondary, and other outcomes, including the specific measurement variable (eg, systolic blood pressure), analysis metric (eg, change from baseline, final value, time to event), method of aggregation (eg, median, proportion), and time point for each outcome. Explanation of the clinical relevance of chosen efficacy and harm outcomes is strongly recommended | 11-14           |
| Participant timeline | 13  | Time schedule of enrolment, interventions (including any run-ins and washouts), assessments, and visits for participants. A schematic diagram is highly recommended (see Figure)                                                                                                                                                                                               | 14, 15, Table 2 |

1  
2  
3  
4  
5  
6  
7  
8  
9  
10  
11  
12  
13  
14  
15  
16  
17  
18  
19  
20  
21  
22  
23  
24  
25  
26  
27  
28  
29  
30  
31  
32  
33  
34  
35  
36  
37  
38  
39  
40  
41  
42  
43  
44  
45  
46  
47

|             |    |                                                                                                                                                                                       |    |
|-------------|----|---------------------------------------------------------------------------------------------------------------------------------------------------------------------------------------|----|
| Sample size | 14 | Estimated number of participants needed to achieve study objectives and how it was determined, including clinical and statistical assumptions supporting any sample size calculations | 15 |
| Recruitment | 15 | Strategies for achieving adequate participant enrolment to reach target sample size                                                                                                   |    |

**Methods: Assignment of interventions (for controlled trials)**

Allocation:

|                                  |     |                                                                                                                                                                                                                                                                                                                                                          |      |
|----------------------------------|-----|----------------------------------------------------------------------------------------------------------------------------------------------------------------------------------------------------------------------------------------------------------------------------------------------------------------------------------------------------------|------|
| Sequence generation              | 16a | Method of generating the allocation sequence (eg, computer-generated random numbers), and list of any factors for stratification. To reduce predictability of a random sequence, details of any planned restriction (eg, blocking) should be provided in a separate document that is unavailable to those who enrol participants or assign interventions | N.A. |
| Allocation concealment mechanism | 16b | Mechanism of implementing the allocation sequence (eg, central telephone; sequentially numbered, opaque, sealed envelopes), describing any steps to conceal the sequence until interventions are assigned                                                                                                                                                | N.A. |
| Implementation                   | 16c | Who will generate the allocation sequence, who will enrol participants, and who will assign participants to interventions                                                                                                                                                                                                                                | N.A. |
| Blinding (masking)               | 17a | Who will be blinded after assignment to interventions (eg, trial participants, care providers, outcome assessors, data analysts), and how                                                                                                                                                                                                                | N.A. |
|                                  | 17b | If blinded, circumstances under which unblinding is permissible, and procedure for revealing a participant's allocated intervention during the trial                                                                                                                                                                                                     | N.A. |

**Methods: Data collection, management, and analysis**

|                         |     |                                                                                                                                                                                                                                                                                                                                                                                                              |       |
|-------------------------|-----|--------------------------------------------------------------------------------------------------------------------------------------------------------------------------------------------------------------------------------------------------------------------------------------------------------------------------------------------------------------------------------------------------------------|-------|
| Data collection methods | 18a | Plans for assessment and collection of outcome, baseline, and other trial data, including any related processes to promote data quality (eg, duplicate measurements, training of assessors) and a description of study instruments (eg, questionnaires, laboratory tests) along with their reliability and validity, if known. Reference to where data collection forms can be found, if not in the protocol | 11-15 |
|                         | 18b | Plans to promote participant retention and complete follow-up, including list of any outcome data to be collected for participants who discontinue or deviate from intervention protocols                                                                                                                                                                                                                    |       |

|    |                                 |     |                                                                                                                                                                                                                                                                                                                                       |                                                                     |
|----|---------------------------------|-----|---------------------------------------------------------------------------------------------------------------------------------------------------------------------------------------------------------------------------------------------------------------------------------------------------------------------------------------|---------------------------------------------------------------------|
| 1  |                                 |     |                                                                                                                                                                                                                                                                                                                                       |                                                                     |
| 2  |                                 |     |                                                                                                                                                                                                                                                                                                                                       |                                                                     |
| 3  | Data management                 | 19  | Plans for data entry, coding, security, and storage, including any related processes to promote data quality (eg, double data entry; range checks for data values). Reference to where details of data management procedures can be found, if not in the protocol                                                                     | 17                                                                  |
| 4  |                                 |     |                                                                                                                                                                                                                                                                                                                                       |                                                                     |
| 5  |                                 |     |                                                                                                                                                                                                                                                                                                                                       |                                                                     |
| 6  |                                 |     |                                                                                                                                                                                                                                                                                                                                       |                                                                     |
| 7  | Statistical methods             | 20a | Statistical methods for analysing primary and secondary outcomes. Reference to where other details of the statistical analysis plan can be found, if not in the protocol                                                                                                                                                              | 15-16                                                               |
| 8  |                                 |     |                                                                                                                                                                                                                                                                                                                                       |                                                                     |
| 9  |                                 |     |                                                                                                                                                                                                                                                                                                                                       |                                                                     |
| 10 |                                 | 20b | Methods for any additional analyses (eg, subgroup and adjusted analyses)                                                                                                                                                                                                                                                              | 16                                                                  |
| 11 |                                 |     |                                                                                                                                                                                                                                                                                                                                       |                                                                     |
| 12 |                                 | 20c | Definition of analysis population relating to protocol non-adherence (eg, as randomised analysis), and any statistical methods to handle missing data (eg, multiple imputation)                                                                                                                                                       | 15                                                                  |
| 13 |                                 |     |                                                                                                                                                                                                                                                                                                                                       |                                                                     |
| 14 |                                 |     |                                                                                                                                                                                                                                                                                                                                       |                                                                     |
| 15 | <b>Methods: Monitoring</b>      |     |                                                                                                                                                                                                                                                                                                                                       |                                                                     |
| 16 |                                 |     |                                                                                                                                                                                                                                                                                                                                       |                                                                     |
| 17 | Data monitoring                 | 21a | Composition of data monitoring committee (DMC); summary of its role and reporting structure; statement of whether it is independent from the sponsor and competing interests; and reference to where further details about its charter can be found, if not in the protocol. Alternatively, an explanation of why a DMC is not needed | N.A.; instead, quality checks of entered data are planned (page 17) |
| 18 |                                 |     |                                                                                                                                                                                                                                                                                                                                       |                                                                     |
| 19 |                                 |     |                                                                                                                                                                                                                                                                                                                                       |                                                                     |
| 20 |                                 |     |                                                                                                                                                                                                                                                                                                                                       |                                                                     |
| 21 |                                 |     |                                                                                                                                                                                                                                                                                                                                       |                                                                     |
| 22 |                                 | 21b | Description of any interim analyses and stopping guidelines, including who will have access to these interim results and make the final decision to terminate the trial                                                                                                                                                               | 15                                                                  |
| 23 |                                 |     |                                                                                                                                                                                                                                                                                                                                       |                                                                     |
| 24 |                                 |     |                                                                                                                                                                                                                                                                                                                                       |                                                                     |
| 25 | Harms                           | 22  | Plans for collecting, assessing, reporting, and managing solicited and spontaneously reported adverse events and other unintended effects of trial interventions or trial conduct                                                                                                                                                     | N.A. is not an intervention study                                   |
| 26 |                                 |     |                                                                                                                                                                                                                                                                                                                                       |                                                                     |
| 27 |                                 |     |                                                                                                                                                                                                                                                                                                                                       |                                                                     |
| 28 | Auditing                        | 23  | Frequency and procedures for auditing trial conduct, if any, and whether the process will be independent from investigators and the sponsor                                                                                                                                                                                           | 17                                                                  |
| 29 |                                 |     |                                                                                                                                                                                                                                                                                                                                       |                                                                     |
| 30 |                                 |     |                                                                                                                                                                                                                                                                                                                                       |                                                                     |
| 31 |                                 |     |                                                                                                                                                                                                                                                                                                                                       |                                                                     |
| 32 | <b>Ethics and dissemination</b> |     |                                                                                                                                                                                                                                                                                                                                       |                                                                     |
| 33 |                                 |     |                                                                                                                                                                                                                                                                                                                                       |                                                                     |
| 34 | Research ethics approval        | 24  | Plans for seeking research ethics committee/institutional review board (REC/IRB) approval                                                                                                                                                                                                                                             | 5, 17                                                               |
| 35 |                                 |     |                                                                                                                                                                                                                                                                                                                                       |                                                                     |
| 36 |                                 |     |                                                                                                                                                                                                                                                                                                                                       |                                                                     |
| 37 | Protocol amendments             | 25  | Plans for communicating important protocol modifications (eg, changes to eligibility criteria, outcomes, analyses) to relevant parties (eg, investigators, REC/IRBs, trial participants, trial registries, journals, regulators)                                                                                                      | 17                                                                  |
| 38 |                                 |     |                                                                                                                                                                                                                                                                                                                                       |                                                                     |
| 39 |                                 |     |                                                                                                                                                                                                                                                                                                                                       |                                                                     |
| 40 |                                 |     |                                                                                                                                                                                                                                                                                                                                       |                                                                     |
| 41 |                                 |     |                                                                                                                                                                                                                                                                                                                                       |                                                                     |
| 42 |                                 |     |                                                                                                                                                                                                                                                                                                                                       |                                                                     |
| 43 |                                 |     |                                                                                                                                                                                                                                                                                                                                       |                                                                     |
| 44 |                                 |     |                                                                                                                                                                                                                                                                                                                                       |                                                                     |
| 45 |                                 |     |                                                                                                                                                                                                                                                                                                                                       |                                                                     |
| 46 |                                 |     |                                                                                                                                                                                                                                                                                                                                       |                                                                     |
| 47 |                                 |     |                                                                                                                                                                                                                                                                                                                                       |                                                                     |

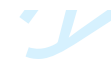

|    |                               |     |                                                                                                                                                                                                                                                                                     |            |
|----|-------------------------------|-----|-------------------------------------------------------------------------------------------------------------------------------------------------------------------------------------------------------------------------------------------------------------------------------------|------------|
| 1  |                               |     |                                                                                                                                                                                                                                                                                     |            |
| 2  |                               |     |                                                                                                                                                                                                                                                                                     |            |
| 3  | Consent or assent             | 26a | Who will obtain informed consent or assent from potential trial participants or authorised surrogates, and how (see Item 32)                                                                                                                                                        | 9-10       |
| 4  |                               |     |                                                                                                                                                                                                                                                                                     |            |
| 5  |                               |     |                                                                                                                                                                                                                                                                                     |            |
| 6  |                               | 26b | Additional consent provisions for collection and use of participant data and biological specimens in ancillary studies, if applicable                                                                                                                                               | N.A.       |
| 7  |                               |     |                                                                                                                                                                                                                                                                                     |            |
| 8  |                               |     |                                                                                                                                                                                                                                                                                     |            |
| 9  | Confidentiality               | 27  | How personal information about potential and enrolled participants will be collected, shared, and maintained in order to protect confidentiality before, during, and after the trial                                                                                                | 17         |
| 10 |                               |     |                                                                                                                                                                                                                                                                                     |            |
| 11 |                               |     |                                                                                                                                                                                                                                                                                     |            |
| 12 | Declaration of interests      | 28  | Financial and other competing interests for principal investigators for the overall trial and each study site                                                                                                                                                                       | 22         |
| 13 |                               |     |                                                                                                                                                                                                                                                                                     |            |
| 14 |                               |     |                                                                                                                                                                                                                                                                                     |            |
| 15 | Access to data                | 29  | Statement of who will have access to the final trial dataset, and disclosure of contractual agreements that limit such access for investigators                                                                                                                                     | 17         |
| 16 |                               |     |                                                                                                                                                                                                                                                                                     |            |
| 17 |                               |     |                                                                                                                                                                                                                                                                                     |            |
| 18 | Ancillary and post-trial care | 30  | Provisions, if any, for ancillary and post-trial care, and for compensation to those who suffer harm from trial participation                                                                                                                                                       | N.A.       |
| 19 |                               |     |                                                                                                                                                                                                                                                                                     |            |
| 20 |                               |     |                                                                                                                                                                                                                                                                                     |            |
| 21 | Dissemination policy          | 31a | Plans for investigators and sponsor to communicate trial results to participants, healthcare professionals, the public, and other relevant groups (eg, via publication, reporting in results databases, or other data sharing arrangements), including any publication restrictions | 17         |
| 22 |                               |     |                                                                                                                                                                                                                                                                                     |            |
| 23 |                               |     |                                                                                                                                                                                                                                                                                     |            |
| 24 |                               |     |                                                                                                                                                                                                                                                                                     |            |
| 25 |                               | 31b | Authorship eligibility guidelines and any intended use of professional writers                                                                                                                                                                                                      | 17         |
| 26 |                               |     |                                                                                                                                                                                                                                                                                     |            |
| 27 |                               | 31c | Plans, if any, for granting public access to the full protocol, participant-level dataset, and statistical code                                                                                                                                                                     | N.A.       |
| 28 |                               |     |                                                                                                                                                                                                                                                                                     |            |
| 29 | <b>Appendices</b>             |     |                                                                                                                                                                                                                                                                                     |            |
| 30 |                               |     |                                                                                                                                                                                                                                                                                     |            |
| 31 | Informed consent materials    | 32  | Model consent form and other related documentation given to participants and authorised surrogates                                                                                                                                                                                  | Attached   |
| 32 |                               |     |                                                                                                                                                                                                                                                                                     |            |
| 33 |                               |     |                                                                                                                                                                                                                                                                                     |            |
| 34 | Biological specimens          | 33  | Plans for collection, laboratory evaluation, and storage of biological specimens for genetic or molecular analysis in the current trial and for future use in ancillary studies, if applicable                                                                                      | N.A. _____ |
| 35 |                               |     |                                                                                                                                                                                                                                                                                     |            |
| 36 |                               |     |                                                                                                                                                                                                                                                                                     |            |

37 \*It is strongly recommended that this checklist be read in conjunction with the SPIRIT 2013 Explanation & Elaboration for important clarification on the items.  
 38 Amendments to the protocol should be tracked and dated. The SPIRIT checklist is copyrighted by the SPIRIT Group under the Creative Commons  
 39 "[Attribution-NonCommercial-NoDerivs 3.0 Unported](https://creativecommons.org/licenses/by-nc-nd/3.0/)" license.  
 40

# BMJ Open

## Epidemiology of injuries, treatment (costs), and outcome in burn patients admitted to a hospital with or without dedicated Burn Center (Burn-Pro); Protocol for a multicenter prospective observational study

|                                 |                                                                                                                                                                                                                                                                                                                                                                                                                                                                                                                                                                                                                                                                                                                                                                                                                                                                                                                                                                                                                                                                                                                                                                                                                                                                                                                                                                                                                                                                                                                                                                                                                                                              |
|---------------------------------|--------------------------------------------------------------------------------------------------------------------------------------------------------------------------------------------------------------------------------------------------------------------------------------------------------------------------------------------------------------------------------------------------------------------------------------------------------------------------------------------------------------------------------------------------------------------------------------------------------------------------------------------------------------------------------------------------------------------------------------------------------------------------------------------------------------------------------------------------------------------------------------------------------------------------------------------------------------------------------------------------------------------------------------------------------------------------------------------------------------------------------------------------------------------------------------------------------------------------------------------------------------------------------------------------------------------------------------------------------------------------------------------------------------------------------------------------------------------------------------------------------------------------------------------------------------------------------------------------------------------------------------------------------------|
| Journal:                        | <i>BMJ Open</i>                                                                                                                                                                                                                                                                                                                                                                                                                                                                                                                                                                                                                                                                                                                                                                                                                                                                                                                                                                                                                                                                                                                                                                                                                                                                                                                                                                                                                                                                                                                                                                                                                                              |
| Manuscript ID                   | bmjopen-2018-023709.R1                                                                                                                                                                                                                                                                                                                                                                                                                                                                                                                                                                                                                                                                                                                                                                                                                                                                                                                                                                                                                                                                                                                                                                                                                                                                                                                                                                                                                                                                                                                                                                                                                                       |
| Article Type:                   | Protocol                                                                                                                                                                                                                                                                                                                                                                                                                                                                                                                                                                                                                                                                                                                                                                                                                                                                                                                                                                                                                                                                                                                                                                                                                                                                                                                                                                                                                                                                                                                                                                                                                                                     |
| Date Submitted by the Author:   | 21-Aug-2018                                                                                                                                                                                                                                                                                                                                                                                                                                                                                                                                                                                                                                                                                                                                                                                                                                                                                                                                                                                                                                                                                                                                                                                                                                                                                                                                                                                                                                                                                                                                                                                                                                                  |
| Complete List of Authors:       | <p>Van Lieshout, Esther M.M.; Erasmus MC, University Medical Center Rotterdam</p> <p>Van Yperen, Daan; Maasstad Ziekenhuis, Burn Center; Erasmus MC, Trauma Research Unit Department of Surgery</p> <p>Van Baar, Margriet; Maasstad Ziekenhuis, Burn Center; Erasmus MC, Department of Public Health</p> <p>Polinder, Suzanne; Erasmus MC, Department of Public Health</p> <p>Boersma, Doeke; Jeroen Bosch Ziekenhuis, Department of Surgery</p> <p>Cardon, Anne; ZorgSaam, Department of Surgery</p> <p>De Rijcke, Piet; IJsselland Ziekenhuis, Department of Surgery</p> <p>Guijt, Marc; Elkerliek Ziekenhuis, Department of Surgery</p> <p>Klem, Taco; Sint Franciscus Gasthuis, Department of Surgery</p> <p>Lansink, Koen; Elisabeth-TweeSteden Ziekenhuis, Department of Surgery</p> <p>Ringburg, Akkie; Ikazia Ziekenhuis, Department of Surgery</p> <p>Staarink, Maarten; Van Weel-Bethesda Ziekenhuis, Department of Surgery</p> <p>Schoot, Leon; Rivas Zorggroep, Department of Surgery</p> <p>van der VEEN, Alexander; Catharina Ziekenhuis, Department of Surgery</p> <p>Van Eijck, Floortje; Bravis ziekenhuis, Department of Surgery</p> <p>Van Eerten, Percy; Maxima Medisch Centrum locatie Veldhoven, Department of Surgery</p> <p>Vegt, Paul; Albert Schweitzer Ziekenhuis, Department of Surgery</p> <p>Vos, DI; Amphia Ziekenhuis, Department of Surgery</p> <p>Waleboerg, Marco; Admiraal De Ruyter Ziekenhuis</p> <p>Verhofstad, Michael; Erasmus MC, University Medical Center Rotterdam, Trauma Surgery</p> <p>Van der Vlies, Cornelis; Maasstad Ziekenhuis, Burn Center; Erasmus MC, Trauma Research Unit Department of Surgery</p> |
| <b>Primary Subject Heading</b>: | Surgery                                                                                                                                                                                                                                                                                                                                                                                                                                                                                                                                                                                                                                                                                                                                                                                                                                                                                                                                                                                                                                                                                                                                                                                                                                                                                                                                                                                                                                                                                                                                                                                                                                                      |
| Secondary Subject Heading:      | Epidemiology, Health economics                                                                                                                                                                                                                                                                                                                                                                                                                                                                                                                                                                                                                                                                                                                                                                                                                                                                                                                                                                                                                                                                                                                                                                                                                                                                                                                                                                                                                                                                                                                                                                                                                               |
| Keywords:                       | Organisation of health services < HEALTH SERVICES ADMINISTRATION & MANAGEMENT, WOUND MANAGEMENT, EPIDEMIOLOGY, HEALTH ECONOMICS, Trauma management < ORTHOPAEDIC & TRAUMA                                                                                                                                                                                                                                                                                                                                                                                                                                                                                                                                                                                                                                                                                                                                                                                                                                                                                                                                                                                                                                                                                                                                                                                                                                                                                                                                                                                                                                                                                    |



1  
2  
3  
4  
5  
6  
7  
8  
9  
10  
11  
12  
13  
14  
15  
16  
17  
18  
19  
20  
21  
22  
23  
24  
25  
26  
27  
28  
29  
30  
31  
32  
33  
34  
35  
36  
37  
38  
39  
40  
41  
42  
43  
44  
45  
46  
47  
48  
49  
50  
51  
52  
53  
54  
55  
56  
57  
58  
59  
60

|  |                  |
|--|------------------|
|  | SURGERY, SURGERY |
|  |                  |

SCHOLARONE™  
Manuscripts

1 **Epidemiology of injuries, treatment (costs), and outcome in burn patients**  
2 **admitted to a hospital with or without dedicated Burn Center (Burn-Pro);**  
3 **Protocol for a multicenter prospective observational study**  
4

5 Esther M.M. Van Lieshout PhD MSc<sup>1A\*</sup>, Daan T. Van Yperen, MD<sup>1,2A</sup>, Margriet E. Van Baar,  
6 PhD<sup>3,4</sup>, Suzanne Polinder PhD<sup>4</sup>, Doeke Boersma MD PhD<sup>5</sup>, Anne Y.M.V.P. Cardon MD<sup>6</sup>,  
7 Piet A.R. De Rijcke MD<sup>7</sup>, Marc Guijt MD<sup>8</sup>, Taco M.A.L. Klem MD PhD<sup>9</sup>, Koen W.W.  
8 Lansink MD PhD<sup>10</sup>, Akkie N. Ringburg MD PhD<sup>11</sup>, Maarten Staarink MD<sup>12</sup>, Leon Van de  
9 Schoot MD<sup>13</sup>, Alexander H. Van der Veen MD PhD<sup>14</sup>, Floortje C. Van Eijck MD PhD<sup>15</sup>,  
10 Percy V. Van Eerten MD<sup>16</sup>, Paul A. Vegt MD PhD<sup>17</sup>, Dagmar I. Vos MD PhD<sup>18</sup>, Marco  
11 Waleboer MD<sup>19</sup>, Michael H.J. Verhofstad MD PhD<sup>1</sup>, Cornelis H. Van der Vlies, MD PhD<sup>1,2</sup>

12  
13 <sup>1</sup>Trauma Research Unit Department of Surgery, Erasmus MC, University Medical Center  
14 Rotterdam, P.O. Box 2040, 3000 CA Rotterdam, The Netherlands

15 <sup>2</sup>Burn Center, Maastad Hospital, P.O. Box 9100, 3007 AC Rotterdam, The Netherlands

16 <sup>3</sup> Association of Dutch Burn Centers, Maastad Hospital, P.O. Box 9100, 3007 AC  
17 Rotterdam, The Netherlands

18 <sup>4</sup> Department of Public Health, Erasmus MC, University Medical Center Rotterdam, P.O. Box  
19 2040, 3000 CA Rotterdam, The Netherlands

20 <sup>5</sup> Department of Surgery, Jeroen Bosch Ziekenhuis, P.O. Box 90153, 5200 ME 's-  
21 Hertogenbosch, The Netherlands

22 <sup>6</sup>Department of Surgery, ZorgSaam Zeeuws-Vlaanderen, 4535 PA Terneuzen, The  
23 Netherlands

24 <sup>7</sup>Department of Surgery, IJsselland Ziekenhuis, P.O. Box 690, 2900 AR Capelle aan den  
25 IJssel, The Netherlands

- 1  
2  
3 26 <sup>8</sup>Department of Surgery, Elkerliek Ziekenhuis, P.O. Box 58, 5700 AB Helmond, The  
4  
5 27 Netherlands  
6  
7 28 <sup>9</sup>Department of Surgery, Franciscus Gasthuis&Vlietland, P.O. Box 10900, 3004 BA  
8  
9 29 Rotterdam, The Netherlands  
10  
11 30 <sup>10</sup>Department of Surgery, Elisabeth TweeSteden Ziekenhuis, P.O. Box 90151, 5000 LC  
12  
13 31 Tilburg, The Netherlands  
14  
15 32 <sup>11</sup>Department of Surgery, Ikazia Ziekenhuis, P.O. Box 5009, 3008 AA Rotterdam, The  
16  
17 33 Netherlands  
18  
19 34 <sup>12</sup>Department of Surgery, Van Weel-Bethesda Ziekenhuis, P.O. Box 153, 3240 AD Dirksland,  
20  
21 35 The Netherlands  
22  
23 36 <sup>13</sup>Department of Surgery, Beatrix Ziekenhuis/Rivas, P.O. Box 90, 4200 AB Gorinchem, The  
24  
25 37 Netherlands  
26  
27 38 <sup>14</sup>Department of Surgery, Catharina Ziekenhuis, P.O. Box 1350, 5602 ZA Eindhoven, The  
28  
29 39 Netherlands  
30  
31 40 <sup>15</sup>Department of Surgery, Bravis Ziekenhuis, P.O. Box 999, 3008 AZ Roosendaal, The  
32  
33 41 Netherlands  
34  
35 42 <sup>16</sup>Department of Surgery, Máxima Medisch Centrum, P.O. Box 7777, 5500 MB Veldhoven,  
36  
37 43 The Netherlands  
38  
39 44 <sup>17</sup>Department of Surgery, Albert Schweitzer Ziekenhuis, P.O. Box 444, 3300 AK Dordrecht,  
40  
41 45 The Netherlands  
42  
43 46 <sup>18</sup>Department of Surgery, Amphia Ziekenhuis, P.O. Box 90158, 4800 RK Breda, The  
44  
45 47 Netherlands  
46  
47 48 <sup>19</sup>Department of Surgery, Admiraal De Ruyter Ziekenhuis, P.O. Box 15, 4460 AA Goes, The  
48  
49 49 Netherlands  
50  
51  
52  
53  
54 50 <sup>A</sup> Both authors contributed equally; <sup>\*</sup> Corresponding author; e.vanlieshout@erasmusmc.nl  
55  
56  
57  
58  
59  
60

1  
2  
3 51 Email addresses:  
4  
5 52 EMMVL: e.vanlieshout@erasmusmc.nl  
6  
7 53 DTVY: yperend@maasstadziekenhuis.nl; d.vanyperen@erasmusmc.nl  
8  
9 54 MEVB: baarm@maasstadziekenhuis.nl  
10  
11 55 SP: s.polinder@erasmusmc.nl  
12  
13 56 DB: d.boersma@jzbz.nl  
14  
15 57 AYMVPC: a.cardon@zzv.nl  
16  
17 58 PARDR: pdrijcke@ysl.nl  
18  
19 59 MG: mguijt@elkerliek.nl  
20  
21 60 TMALK: t.klem@franciscus.nl  
22  
23 61 KWWL: k.lansink@elisabeth.nl  
24  
25 62 ANR: a.ringburg@ikazia.nl  
26  
27 63 MS: m.staarink@vanweelbethesda.nl  
28  
29 64 LVDS: l.van.de.schoot@rivas.nl  
30  
31 65 AHVDV: alexander.vd.veen@catharinaziekenhuis.nl  
32  
33 66 FCVE: f.vaneijck@bravis.nl  
34  
35 67 PVVE: p.vaneerten@mmc.nl  
36  
37 68 PAV: p.a.vegt@asz.nl  
38  
39 69 DIV: dvos@amphia.nl  
40  
41 70 MW: m.waleboer@adrz.nl  
42  
43 71 MHJV: m.verhofstad@erasmusmc.nl  
44  
45 72 CHVDV: vliesc@maasstadziekenhuis.nl; [c.vandervlies@erasmusmc.nl](mailto:c.vandervlies@erasmusmc.nl)  
46  
47  
48  
49  
50  
51  
52  
53  
54  
55  
56  
57  
58  
59  
60

## 75 **Abstract**

### 76 **Introduction**

77 The Emergency Management of Severe Burns (EMSB) referral criteria have been  
78 implemented for optimal triaging of burn patients. Admission to a Burn Center is indicated  
79 for patients with severe burns or with specific characteristics like older age or comorbidities.  
80 Patients not meeting these criteria can also be treated in a hospital without Burn Center.

81 Limited information is available about the organization of care and referral of these patients.

82 The aims of this study are to determine the burn injury characteristics, treatment (costs),  
83 Quality of Life, and scar quality of burn patients admitted to a hospital without dedicated  
84 Burn Center. These data will subsequently be compared with data from patients with <10%  
85 Total Body Surface Area (TBSA) burned who are admitted (or secondarily referred) to a Burn  
86 Center. If admissions were in agreement with the EMSB referral criteria will also be  
87 determined.

### 88 **Methods and analysis**

89 In this multicenter, prospective, observational study (cohort study), the following two groups  
90 of patients will be followed; 1) All patients (no age limit) admitted with burn-related injuries  
91 to a hospital without a dedicated Burn Center in the Southwest Netherlands or Brabant  
92 Trauma Region ; and 2) All patients (no age limit) with <10% Total Body Surface Area  
93 (TBSA) burned who are primarily admitted (or secondarily referred) to the Burn Center of  
94 Maastad Hospital. Data on the burn injury characteristics (primary outcome), EMSB  
95 compliance, treatment, treatment costs, and outcome will be collected from the patients'  
96 medical files. At three weeks and at three, six, and 12 months after trauma, patients will be  
97 asked to complete the Quality of Life (EuroQoL-5D; EQ-5D), and the patient-reported part of  
98 the Patient and Observer Scar Assessment Scale (POSAS). At those time visits, the

1  
2  
3 99 coordinating investigator or research assistant will complete the observer-reported part of the  
4  
5 100 POSAS.

6  
7 101 **Ethics and dissemination**

8  
9 102 This study has been exempted by the medical research ethics committee (MREC) Erasmus  
10  
11 103 MC (Rotterdam, The Netherlands). Each participant will provide written consent to  
12  
13 104 participate and remain encoded during the study. The results of the study are planned to be  
14  
15 105 published in an international, peer-reviewed journal.

16  
17  
18 106 **Registration details**

19  
20 107 The study is registered at the Netherlands Trial Register (NTR6565; date 12-jul-2017).

21  
22 108

23  
24 109 **Keywords**

25  
26 110 Burn; Costs; Epidemiology; Etiology; Outcome; Quality of Life; Referral; Scar; Treatment.

27  
28 111  
29  
30  
31  
32  
33  
34  
35  
36  
37  
38  
39  
40  
41  
42  
43  
44  
45  
46  
47  
48  
49  
50  
51  
52  
53  
54  
55  
56  
57  
58  
59  
60

1  
2  
3 112 **Article Summary**  
4

5  
6 113 **Strengths and limitations of this study:**  
7

- 8 114 - This study will provide insight into care of burn patients both in hospitals with and  
9  
10 115 without a dedicated Burn Center  
11  
12 116 - It is a prospective, multicenter, observational study with a best possible methodological  
13  
14 117 design.  
15  
16 118 - Participation of over 20 participating hospitals will increase the reliability and  
17  
18 119 generalizability of the data  
19  
20 120 - Although the study will be mostly relevant for the Netherlands, it is also informative for  
21  
22  
23 121 other regions.  
24

25 122  
26  
27  
28  
29  
30  
31  
32  
33  
34  
35  
36  
37  
38  
39  
40  
41  
42  
43  
44  
45  
46  
47  
48  
49  
50  
51  
52  
53  
54  
55  
56  
57  
58  
59  
60

## 123 **Introduction**

124 Burns cause significant morbidity and mortality worldwide. Globally, some studies are  
125 available on the epidemiology of Emergency Department (ED) treatments of burn injuries[1-  
126 8], including three from the Netherlands[7-9]. These data were limited to home and leisure  
127 accidents; work-related burn injuries were not included.

128

129 Depending on the severity, burn injuries may require specialized burn care. In order to enable  
130 proper triaging and referral, the Emergency Management of Severe Burns (EMSB) referral  
131 criteria have been implemented (Table 1)[10].

132

133 In 2014, 322 patients with burns or inhalation injury were admitted to a hospital in the trauma  
134 region South-West Netherlands. Of these patients, 109 (34%) were admitted to hospitals  
135 without specialized Burn Center. There is a lack of insight into the epidemiology, treatment  
136 (including treatment costs), and outcome (both clinical results and Quality and Life) of the  
137 patients treated in hospitals without Burn Center.

138

139 In order to get insight into the epidemiology of burn patients, detailed data collection on  
140 patient characteristics, etiology, burn injury characteristics, treatment, and outcome is critical.

141 Such data are currently not available from current registries. The Dutch Burn Repository

142 (DBR) R3 only registers data for patients admitted to a Burn Center[11]. The National Injury

143 Surveillance System (in Dutch: Letsel Informatie Systeem, LIS; [www.veiligheid.nl](http://www.veiligheid.nl))[12] and

144 the National Medical Registration (in Dutch: Landelijke Medische Registratie, LMR;

145 [www.dutchhospitaldata.nl](http://www.dutchhospitaldata.nl))[13] register non-admitted and admitted patients, respectively.

146 Both are insufficient, as they register patients based on the main diagnosis, which may not

147 always be the burn injury. The Dutch National Trauma Registry (in Dutch: Landelijke



1  
2  
3 148 Trauma Registratie, LTR; [www.lnaz.nl](http://www.lnaz.nl)) registers all admitted trauma patients. It encodes burn  
4  
5 149 wounds, but with limited detail, and does not contain relevant treatment and outcome data.

6  
7 150

8  
9 151 Based on the above, there are currently no data available that provide sufficient details about  
10  
11 152 patients admitted to a hospital without Burn Center. It is also not clear if these are different  
12  
13 153 for patients with similar burn injury severity admitted to a Burn Center. The main aim of this  
14  
15 154 study is to determine the burn injury characteristics of burn patients admitted to a hospital  
16  
17 155 without dedicated Burn Center. Secondary aims are 1) to determine if these admissions were  
18  
19 156 in agreement with the EMSB referral criteria; 2) to determine the treatment and direct medical  
20  
21 157 costs, the Quality of Life (EuroQoL-5D; EQ-5D), and scar quality (Patient and Observer Scar  
22  
23 158 Assessment Scale; POSAS) for these patients until 12 months follow-up; and 3) to compare  
24  
25 159 the injury pattern and outcome of these patients with burn patients with <10% Total Body  
26  
27 160 Surface Area (TBSA) burned who are admitted (or secondarily referred) to a Burn Center. We  
28  
29 161 expect that burn patient admission outside the Burn Center is restricted to a maximum of 10%  
30  
31 162 TBSA, and that outcome is similar to that achieved for a subgroup with similar burn injury  
32  
33 163 severity admitted to a Burn Center.  
34  
35  
36

37 164  
38  
39  
40  
41  
42  
43  
44  
45  
46  
47  
48  
49  
50  
51  
52  
53  
54  
55  
56  
57  
58  
59  
60

## 165 **Methods and analyses**

### 166 **Study design and setting**

167 This study will follow a multicenter, prospective, observational study design (cohort study).  
168 Patients will be recruited from every hospital in two large trauma regions in The Netherlands,  
169 the South-West Netherlands trauma region and Network Emergency Care Brabant. The Burn  
170 Center of Maasstad Hospital is included in the South-West Netherlands trauma area. The  
171 following 18 hospitals in The Netherlands will participate: Admiraal De Ruyter Ziekenhuis  
172 (Goes), Albert Schweitzer Ziekenhuis (Dordrecht), Amphia Ziekenhuis (Breda), Beatrix  
173 Ziekenhuis (Gorinchem), Bravis Ziekenhuis (Roosendaal), Catharina Ziekenhuis  
174 (Eindhoven), Elisabeth-TweeSteden Ziekenhuis (Tilburg), Elkerliek Ziekenhuis (Helmond),  
175 Erasmus MC, University Medical Center (Rotterdam), Franciscus Gasthuis & Vlietland  
176 (Rotterdam), IJsselland Ziekenhuis (Capelle aan de IJssel), Ikazia Ziekenhuis (Rotterdam),  
177 Jeroen Bosch Ziekenhuis ('s-Hertogenbosch), Burn Center Maasstad Hospital (Rotterdam),  
178 Máxima Medisch Centrum (Veldhoven), Van Weel-Bethesda Ziekenhuis (Dirksland), and  
179 ZorgSaam Zeeuws-Vlaanderen (Terneuzen). The study started in September, 2017 and the  
180 recruiting periods will be 18 months. With a follow-up of one year the presentation of data  
181 will be expected by the end of 2020.

182

### 183 **Study registration**

184 The study is registered at the Netherlands Trial Register (NTR6565; date 12-jul-2017).

185

### 186 **Recruitment and informed consent**

187 Eligible persons admitted with burn-related injuries (or the parents of pediatric patients) will  
188 be informed about the study as soon as possible after hospital presentation. They may receive  
189 the information at the ED or while admitted at the surgical ward. The local staff will ask

1  
2  
3 190 permission to send contact details to the research team. Upon receipt of that permission, a  
4  
5 191 local contact person in the participating hospital will provide details of the patient to the  
6  
7 192 research team. The coordinating investigator or research assistant will contact the patient (or  
8  
9 193 parents) to explain the study, and will send the information brochure and informed consent  
10  
11 194 form. The coordinating investigator or a research assistant will attend the patient's outpatient  
12  
13 195 visit in the hospital (at approximately three weeks after admission) in order to further explain  
14  
15 196 the study, answer any question the patient (or parents) may have, and for signing informed  
16  
17 197 consent. This gives patients on average two to three weeks to consider their participation. As  
18  
19 198 data collection also includes investigation of the TBSA and extent of burn wounds, it is not  
20  
21 199 possible to give patients more time to consider their participation.  
22  
23

24 200 In order to reduce bias as much as possible, the follow-up measurements by the  
25  
26 201 clinical investigator or research assistant will be performed using a standardized protocol.  
27  
28  
29

### 30 202

### 31 203 **Study population and eligibility criteria**

32 204 The study population will consist of a group of patients admitted to a hospital without  
33  
34 205 dedicated burn center or who are admitted to a dedicated burn center. In order to be eligible to  
35  
36 206 participate in this study, a subject must meet all of the following criteria:  
37  
38

39 207 1) Patients with burn-related injuries (no age limit), admitted to a hospital without dedicated  
40  
41 208 Burn Center in the trauma regions South-West Netherlands or Brabant; or patients with  
42  
43 209 <10% TBSA burned, who are primarily admitted or secondarily referred to the Burn  
44  
45 210 Center of Maasstad Hospital\*

46  
47 211 2) Provision of informed consent

48  
49 212 \* 10% has been chosen as we expect that patients admitted outside the Burn Centers will have  
50  
51 213 no more than 10% TBSA burned. This is also in line with the EMSB referral criteria[10]. The  
52  
53  
54  
55  
56  
57  
58  
59

1  
2  
3 214 % TBSA will be assessed during physical examination by a research physician who has had  
4  
5 215 elaborate training for this at the participating dedicated Burn Center.  
6

7 216

8  
9 217 A potential subject who meets any of the following criteria will be excluded from  
10  
11 218 participation in this study:

12  
13 219 1) Patients who died <24 hours due to severity of non-burn injuries (*e.g.*, severe head injury)

14  
15 220 2) Patients with incomplete or unknown contact information

16  
17 221 3) Insufficient comprehension of the Dutch or English language to understand the  
18  
19 222 questionnaires  
20

21  
22 223

23  
24 224 **Outcome measures**

25  
26 225 The burn-related injury pattern will serve as primary outcome measure. Information on the  
27  
28 226 following items, representing injuries and mechanism, will be collected from the patients'  
29  
30 227 medical files:

31  
32 228 - Inhalation injury (yes or no)

33  
34 229 - Body regions burned, severity (% TBSA burned as assessed by a trained research  
35  
36 230 physician)

37  
38 231 - Extent of burns (superficial dermal, deep dermal, or subdermal)

39  
40 232 - Setting (home, work, or other)

41  
42 233 - Burn etiology (scald, flame, contact, chemical, or other)  
43

44  
45 234

46  
47  
48 235 The secondary outcome measures are:

49  
50 236 1) Compliance with EMSB referral criteria (yes or no)

51  
52 237 2) Treatment

53  
54 238 3) Health care use in hospital with associated treatment costs  
55  
56  
57  
58  
59  
60

1  
2  
3  
4  
5  
6  
7  
8  
9  
10  
11  
12  
13  
14  
15  
16  
17  
18  
19  
20  
21  
22  
23  
24  
25  
26  
27  
28  
29  
30  
31  
32  
33  
34  
35  
36  
37  
38  
39  
40  
41  
42  
43  
44  
45  
46  
47  
48  
49  
50  
51  
52  
53  
54  
55  
56  
57  
58  
59  
60

239 4) Health-Related Quality of life (EuroQol-5D-3L (EQ-5D-3L))

240 5) Patient and Observer Scar Assessment Scale (POSAS)

241

242 The following treatment characteristics will be collected:

243 - Prehospital transport (ambulance, helicopter emergency medical services, or other

244 - Level of trauma care (level 1, 2, or 3)

245 - Required care (ward or Intensive Care Unit)

246 - Resuscitation (amount of fluid <24h after admission)

247 - Intubation (yes or no)

248 - Bronchoscopy (yes or no)

249 - Wound treatment (wound dressing, topical therapy, or other)

250 - Date of the first operation

251 - Escharotomy (yes or no)

252 - Type of operation (split skin grafting, full thickness skin grafting, or excision and  
253 primary closure)

254 - % TBSA that needed skin grafting

255 - Expansion of split skin graft (1:1, 1:1.5, 1:3, or 1:6)

256 - Total number of operations

257 - Indication for second, third, and any subsequent operation

258 - Number of outpatient department visits

259 - Date of discharge from hospital

260 - Reconstructive surgery (release/excision with split skin grafting, full thickness grafting,  
261 or laps)

262

1  
2  
3 263 In order to determine the treatment costs, the use of hospital resources will be collected from  
4  
5 264 medical files directly. All direct medical costs due to treatment, complications, and events  
6  
7 265 during follow-up (*e.g.*, ED visit, diagnostic work-up, therapy, events, surgery, admissions,  
8  
9 266 follow-up visits) will be collected. The economic evaluation will be in accordance with the  
10  
11 267 Dutch guideline and will use cost prices where possible[14]. Medical costs will be calculated  
12  
13 268 by multiplying the volumes of health care use with the corresponding unit prices.  
14

15 269  
16  
17  
18 270 The EQ-5D is a validated questionnaire for measuring health-related quality of life[15, 16].  
19  
20 271 Its use is recommended for the assessment of quality of life in trauma patients, especially for  
21  
22 272 economic assessments[17, 18]. The EQ-5D-3L descriptive system consists of five dimensions  
23  
24 273 of health (mobility, self-care, usual activities, pain/discomfort anxiety/depression), each with  
25  
26 274 three possible answers. Scores are converted to a utility score ranging from zero to one, with  
27  
28 275 lower scores indicating poorer quality of life. The EQ Visual Analog Score (VAS) records the  
29  
30 276 respondents self-rated health status on a vertical (0-100) visual analog scale. Patients aged 16  
31  
32 277 years or older will be asked to complete the EQ-5D themselves. Pediatric patients (<16 years)  
33  
34 278 will be asked to complete the youth version of the EQ-5D, or their parent(s) will be asked to  
35  
36 279 complete a proxy version of the EQ-5D youth version.  
37  
38

39 280  
40  
41 281 The POSAS v2.0 ([www.posas.org](http://www.posas.org))[19] consists of two parts: a Patient Scale and an Observer  
42  
43 282 Scale, which aim to provide a rating of several measured of scar quality (vascularity,  
44  
45 283 pigmentation, relief/texture, thickness, pliability, surface area, pain, and itching/pruritus).  
46  
47 284 Patients aged 16 years or older and parents of younger pediatric patients will complete the  
48  
49 285 patient-reported part, a trained observer will complete the observer-reported part.  
50  
51

52 286  
53

54 287 **Other data collected**  
55  
56  
57  
58  
59  
60

1  
2  
3 288 The following, additional, data will be collected in order to describe the study population,  
4  
5 289 patient characteristics, additional injury characteristics, and burn-related (adverse) events:  
6  
7 290 - Patient characteristics: age, gender, American Society of Anesthesiologists (ASA)  
8  
9 291 classification, comorbidities (diabetes or other)  
10  
11 292 - Additional injury characteristics: Injury Severity Score (ISS), Abbreviated Injury Score  
12  
13 293 (AIS), for all nine anatomical regions as registered in the trauma registry)  
14  
15 294 - Burn-related (adverse) events: hematoma (yes or no), excessive blood loss (requiring  
16  
17 295 blood transfusion), wound infection (requiring antibiotic and/or surgical treatment) (yes  
18  
19 296 or no), pneumonia (yes or no), graft loss requiring surgical intervention (or vac therapy;  
20  
21 297 yes or no), or other.  
22  
23 298 - Outcome related variables: duration of hospital admission, time to wound closure  
24  
25 299 (calculated from date of admission and date of last wound dressing), percentage graft take  
26  
27 300 5-7 days post burn, discharge destination (home, other hospital, Burn Center,  
28  
29 301 rehabilitation facility, or other), and mortality (possibly burn-related yes or no)  
30  
31  
32

302

### 303 **Study procedures, data collection methods and participant timelines**

304 Patients will be followed for one year, with visits planned at three weeks (window 2-4  
305 weeks), three months (window 11-15 weeks), six months (window 5-7 months), and 12  
306 months (window 12-14 months) after admission (Table 2). One additional, optional visit is  
307 planned at six weeks (window 5-7 weeks) in case the burn wound has not closed at three  
308 weeks. Wound closure is defined as 95% closure, as judged upon wound inspection by the  
309 research physician and the local treating physician or specialized wound care nurse. In case of  
310 disagreement, consensus will be reached by discussion. The coordinating investigator or  
311 research assistant will be present at each outpatient department visit of the enrolled patients  
312 for direct collection of data. The study will not interfere with treatment or follow-up.

1  
2  
3 313 Patient characteristics, injury characteristics, and any other relevant data will be  
4  
5 314 collected from the patient's medical files as soon as possible after signing informed consent.  
6  
7 315 Treatment and other clinical data such as adverse events will be collected (partly from the  
8  
9 316 patient files) at each follow-up visit. During these regular clinical visits, any radiographs or  
10  
11 317 digital photos that are routinely obtained will be collected. For the purpose of the study,  
12  
13 318 additional details concerning treatment and outcome that are not mentioned in the patient's  
14  
15 319 hospital files, may be registered on the case report forms directly. At the one-year follow-up  
16  
17 320 visit, the coordinating investigator or research assistant will document any secondary  
18  
19 321 intervention that may be planned for the patient.  
20  
21

22 322 As soon as possible after inclusion, patients will be asked to complete the EQ-5D-3L  
23  
24 323 reflecting their pre-injury quality of life. At three months, six months, and at 12 months after  
25  
26 324 the primary hospital admission, patients (or the parents of pediatric patients) will be asked to  
27  
28 325 complete the EQ-5D-3L and the patient-reported part of the POSAS. The coordinating  
29  
30 326 investigator or research assistant will complete the physician-reported part of the POSAS.  
31  
32

33 327

### 34 328 **Blinding**

35  
36  
37 329 Patients, the research physician who determines % TBSA, wound closure, and scar quality,  
38  
39 330 and the statistician will not be blinded.  
40

41 331

### 42 332 **Sample size**

43  
44  
45 333 Given the epidemiologic nature of the primary aim and the lack of information of the  
46  
47 334 population admitted to a hospital without Burn Center, a formal sample size calculation was  
48  
49 335 not made. By including all patients treated in the trauma regions South-West Netherlands and  
50  
51 336 Brabant during 18 months, as well as all patients with >10% TBSA burned who are primarily  
52  
53 337 admitted or secondarily referred to a Burn Center, the maximum number of inclusions will be  
54  
55 338 achieved in both cohorts. The larger the number of patients, the more reliable the analysis will  
56  
57  
58  
59



1  
2  
3 339 be. Enrolling all patients possible will result in the highest reliability of data (*i.e.*, accurate  
4  
5 340 point estimate with lowest possible variance). Based on the data in the annual report of  
6  
7 341 Trauma Center South-West Netherland (*i.e.*, 109 patients admitted outside the Burn Center in  
8  
9 342 the year 2014), we expect to include approximately 300 patients in 18 months in the two  
10  
11 343 trauma regions combined.

12  
13 344

### 14 345 **Statistical analysis**

15  
16 346 Data will be analyzed using the Statistical Package for the Social Sciences (SPSS) version  
17  
18 347 21.0 or higher (SPSS, Chicago, Ill., USA) and will be reported following the Strengthening  
19  
20 348 the Reporting of Observational studies in Epidemiology (STROBE) guidelines. Missing  
21  
22 349 values will not be replaced by imputation. Normality of continuous data will be tested with  
23  
24 350 the Shapiro-Wilk test, and homogeneity of variances will be tested using the Levene's test. A  
25  
26 351 p-value <0.05 will be taken as threshold of statistical significance in all statistical tests, and all  
27  
28 352 tests will be two-sided. No interim analysis is planned.

29  
30  
31 353 First, descriptive analysis will be performed in order to report the outcome measures  
32  
33 354 and other collected data. Data will be reported for the entire population as well as separately  
34  
35 355 for the group of patients admitted to a hospital without versus with a Burn Center. For  
36  
37 356 continuous data (*e.g.*, EQ-5 and POSAS, the mean and SD (parametric data) or the median  
38  
39 357 and quartiles (non-parametric data) will be reported. The only exception are cost data, these  
40  
41 358 will be reported as mean with 95% confidence interval (95% CI). The 95% CI around the  
42  
43 359 mean costs will be approximated by nonparametric bootstrapping. For categorical data (*e.g.*,  
44  
45 360 EMSB compliance), the number and frequencies will be reported.

46  
47  
48 361 Next univariate analysis will be done in order to compare the two cohorts. Statistical  
49  
50 362 significance of difference between the two groups will be tested using a Student's T-test  
51  
52 363 (parametric, continuous data; with or without equal variance assumed as applicable), Mann-  
53  
54  
55  
56  
57  
58  
59  
60

1  
2  
3 364 Whitney U-test (non-parametric, continuous data), or Chi-squared or Fisher's Exact test  
4  
5 365 (categorical data, as applicable).  
6

7 366 Subgroups will be determined based on the patients included. Relevant subgroups can  
8  
9 367 be children versus adults versus elderly, subgroups with different percentages TBSA burned,  
10  
11 368 or patients admitted in compliance versus disagreement with the EMSB referral criteria.  
12  
13 369 Should formal testing between the latter two subgroups be feasible, this will be done as  
14  
15 370 described above.  
16

17 371 The economic evaluation will include costs for health care. Direct and indirect,  
18  
19 372 medical and non-medical cost will be measured as indicated in the Dutch guidelines for  
20  
21 373 economic evaluations, using standard, published cost prices where possible[14].  
22  
23  
24

25 374

#### 26 375 **Data management and monitoring**

27  
28 376 Data will be encoded and stored in a pass-word protected OpenClinica database with  
29  
30 377 restricted access to the researchers only. Data will be entered once. Quality of the entered data  
31  
32 378 will be monitored by checking entry for a random sample of patients prior to database  
33  
34 379 locking.  
35

36 380

#### 37 381 **Patient and public involvement**

38  
39 382 The need for this study emerged from meetings of the Association of Dutch Burn Centers as  
40  
41 383 well as the Dutch Burns Foundation, representing both health care professionals and patients.  
42  
43 384 Input into the design, comparison, and outcome measures was given during presentation for  
44  
45 385 the Scientific Board of the Dutch Burns Foundation. Patients were not directly involved in the  
46  
47 386 subsequent writing of the protocol, nor were they directly involved in the recruitment to and  
48  
49 387 conduct of the study. A summary of the main results will be made available to study  
50  
51 388 participants on request.  
52  
53

54 389  
55  
56  
57  
58  
59  
60

## 390 **Ethics and dissemination**

391 This study will be conducted according to the principles of the Declaration of Helsinki (64<sup>th</sup>  
392 World Medical Association General Assembly, Fortaleza, Brazil, October 2013).

393 This study has been exempted by the medical research ethics committee (MREC)  
394 Erasmus MC (Rotterdam, The Netherlands). This MREC acts as central ethics committee for  
395 this trial (reference number MEC-2017-356). Approval has been obtained from the local  
396 hospital boards in all participating centers. Following review of the protocol (version 1.0 date  
397 22-may-2017, the MREC concluded that this study is not subject to the Medical Research  
398 Involving Human Subjects Act (WMO). They concluded that the study is a medical/scientific  
399 research, but no patients are subjected to procedures or are required to follow rules of  
400 behavior. Consequently, the statutory obligation to provide insurance for subjects  
401 participating in medical research (article 7 of the WMO) does not apply. Any important  
402 changes in the protocol will be submitted to the accredited MREC. The results of the study  
403 are planned to be published in an international, peer reviewed journal and presented at  
404 national and international trauma and burn care meetings. Each participating center will  
405 provide a group author to every publication. No personal data of study participants will be  
406 presented.

407

## 408 Discussion

409 Burns cause significant morbidity and mortality worldwide, and depending on the severity,  
410 burn injuries may require specialized burn care in a dedicated Burn Centers. In order to enable  
411 optimal triaging and referral to a Burn Center, the EMSB referral criteria have been  
412 implemented[10]. Whereas extensive injury and outcome registration exists for patients  
413 admitted to a dedicated Burn Center, there are currently no data available that provide  
414 sufficient details about patients admitted to a hospital without Burn Center. Successful  
415 completion of this study will provide more insight into the percentage of patients admitted to  
416 a hospital without dedicated Burn Center. It will also provide us detailed data on patient and  
417 injury characteristics, EMSB compliance, treatment, treatment costs, relevant outcome data,  
418 and quality of life of burn patients with primary admission at a hospital without Burn Center  
419 as well as patients with <10% TBSA burned who are secondarily referred to a Burn Center.  
420 Twenty-one hospitals will participate. Although the participation of multiple hospitals may  
421 introduce treatment bias, it also makes the results more generalizable.

422

423 **References**

- 424 1. Akerlund E, Huss FR, Sjoberg F. Burns in Sweden: an analysis of 24,538 cases during  
425 the period 1987-2004. *Burns* 2007;33(1):31-36
- 426 2. DeKoning EP, Hakenewerth A, Platts-Mills TF, Tintinalli JE. Epidemiology of burn  
427 injuries presenting to North Carolina emergency departments in 2006-2007. *Burns*  
428 2009;35(6):776-782
- 429 3. D'Souza AL, Nelson NG, McKenzie LB. Pediatric burn injuries treated in US  
430 emergency departments between 1990 and 2006. *Pediatrics* 2009;124(5):1424-1430
- 431 4. Fagenholz PJ, Sheridan RL, Harris NS, Pelletier AJ, Camargo CA, Jr. National study  
432 of Emergency Department Visits for burn injuries, 1993 to 2004. *J Burn Care Res*  
433 2007;28(5):681-690
- 434 5. Onarheim H, Jensen SA, Rosenberg BE, Guttormsen AB. The epidemiology of  
435 patients with burn injuries admitted to Norwegian hospitals in 2007. *Burns*  
436 2009;35(8):1142-1146
- 437 6. Wasiak J, Spinks A, Ashby K, et al. The epidemiology of burn injuries in an  
438 Australian setting, 2000-2006. *Burns* 2009;35(8):1124-1132
- 439 7. Den Hertog PC, Blankendaal FA, Ten Hag SM. Burn injuries in The Netherlands.  
440 *Accid Anal Prev* 2000;32(3):355-364
- 441 8. Van Rijn OJ, Grol ME, Bouter LM, Mulder S, Kester AD. Incidence of medically  
442 treated burns in The Netherlands. *Burns* 1991;17(5):357-362
- 443 9. Goei H, Wijnen BFM, Mans S, et al. Optimizing recruitment strategy for follow-up in  
444 patients with a burn related emergency department visit: a feasibility study.  
445 [submitted].
- 446 10. The Education Committee of the Australian and New Zealand Burn Association.  
447 Emergency management of severe burns (EMSB) course manual, Dutch version.  
448 Dutch Burn Foundation; 2009.
- 449 11. Dokter J, Vloemans AF, Beerthuizen GI, et al. Epidemiology and trends in severe  
450 burns in the Netherlands. *Burns* 2014;40(7):1406-1414
- 451 12. Meerding WJ, Polinder S, Lyons RA, et al. How adequate are emergency department  
452 home and leisure injury surveillance systems for cross-country comparisons in  
453 Europe? *Int J Inj Contr Saf Promot* 2010;17(1):13-22
- 454 13. Van der Stegen R, Ploemacher J. Description of methods for statistics by diagnoses in  
455 time by using the LMR (1981-2005). The Hague: Statistics Netherlands (CBS).  
456 2009;9
- 457 14. Hakkaart-van Roijen L, Van der Linden N, Bouwmans C, Kanters T, Tan SS Van  
458 goede zorg verzekerd, BIJLAGE 1: Kostenhandleiding: Methodologie van  
459 kostenonderzoek en referentieprijzen voor economische evaluaties in de  
460 gezondheidszorg. 2016.
- 461 15. Brooks R, Rabin RE, Eds DC: The measurement and valuation of health status using  
462 EQ-5D: a European perspective. Europe: Kluwer Academic Publishers; 2003.
- 463 16. Lamers LM, Stalmeier PF, McDonnell J, Krabbe PF, Van Busschbach JJ. Measuring  
464 the quality of life in economic evaluations: the Dutch EQ-5D tariff. *Ned Tijdschr*  
465 *Geneesk* 2005;149(28):1574-1578
- 466 17. Neugebauer E, Bouillon B, Bullinger M, Wood-Dauphinee S. Quality of life after  
467 multiple trauma--summary and recommendations of the consensus conference. *Restor*  
468 *Neurol Neurosci* 2002;20(3-4):161-167
- 469 18. Van Beek EF, Larsen CF, Lyons RA, et al. Guidelines for the conduction of follow-  
470 up studies measuring injury-related disability. *J Trauma* 2007;62(2):534-550

- 1  
2  
3 471 19. Van de Kar AL, Corion LU, Smeulders MJ, et al. Reliable and feasible evaluation of  
4 472 linear scars by the Patient and Observer Scar Assessment Scale. *Plast Reconstr Surg*  
5 473 2005;116(2):514-522  
6 474

7  
8  
9  
10  
11  
12  
13  
14  
15  
16  
17  
18  
19  
20  
21  
22  
23  
24  
25  
26  
27  
28  
29  
30  
31  
32  
33  
34  
35  
36  
37  
38  
39  
40  
41  
42  
43  
44  
45  
46  
47  
48  
49  
50  
51  
52  
53  
54  
55  
56  
57  
58  
59  
60

For peer review only

## 475 **List of abbreviations used**

476 AIS, Abbreviated Injury Scale; ASA classification, American Society of Anesthesiologists  
477 classification; 95%CI, 95% Confidence Interval; DBR R3, Dutch Burn Repository R3; ED,  
478 Emergency Department; EMSB, The Emergency Management of Severe Burns; EQ-5D,  
479 EuroQoL-5D; ISS, Injury Severity Score; LIS, Letsel Informatie Systeem (in English:  
480 National Injury Surveillance System); LMR, Landelijke Medische Registratie (in English:  
481 National Medical Registration); LNAZ, Landelijke Netwerk Acute Zorg (in English: National  
482 Network Acute Care); LTR, Landelijke Trauma Registratie (in English: National Trauma  
483 Registry); MEC, Medisch Ethische Commissie (in English: Medical Research Ethics  
484 Committee (MREC); NTR, Nederlands Trial Register (in English; Netherlands National Trial  
485 Register); POSAS, Patient and Observer Scar Assessment Scale; QoL, Quality of Life; SD,  
486 Standard Deviation; SPSS, Statistical Package for the Social Sciences; STROBE,  
487 STrengthening the Reporting of OBServational studies in Epidemiology; TBSA, Total Body  
488 Surface Area; VAS, Visual Analog Scale; WMO, Medical Research Involving Human  
489 Subjects Act (in Dutch: Wet Medisch-wetenschappelijk Onderzoek met Mensen).

490

## 491 **Competing interests**

492 The authors declare that they have no competing interests.

493

## 494 **Authors' contributions**

495 EMMVL, DTVY, MEVB, SP, MHJV, and CHVDV developed the study. MHJV will act as  
496 trial principal investigator. DTVY, DB, AYMVPC, PARDR, MG, TMALK, KWWL, ANR,  
497 MS, LVDS, AHVDV, FCVE, PVVE, PAV, DIV, MW, MHJV, and CHVDV will participate  
498 in patient inclusion and outcome assessment. DTVY, SP, and EMMVL will perform

1  
2  
3 499 statistical analysis of the study data. DTVY and EMMVL drafted the current manuscript. All  
4  
5 500 other authors have read and approved this final manuscript. At the end of the study, DTVY  
6  
7 501 and EMMVL will draft the manuscript. All other authors will interpret the data, critically  
8  
9 502 revise the manuscript, and approve the final version to be submitted.  
10

11 503

## 12 13 504 **Funding statement**

14  
15  
16 505 This research received a specific grant from the Dutch Burns Foundation (Beverwijk, The  
17  
18 506 Netherlands; reference number WO/16.110). The funder of the study has no role in study  
19  
20 507 design, data collection, data analysis, data interpretation, or writing of the report.  
21  
22

23 508

## 24 25 509 **Competing interests statement**

26  
27  
28 510 The authors declare that they have no competing interests.  
29  
30  
31  
32  
33  
34  
35  
36  
37  
38  
39  
40  
41  
42  
43  
44  
45  
46  
47  
48  
49  
50  
51  
52  
53  
54  
55  
56  
57  
58  
59  
60



511 **Tables**512 **Table 1: EMSB referral criteria**[10]

- 
- 1) The percentage Total Body Surface Area burned (TBSA burned; >10% TBSA in adults or >5% in children)
  - 2) Burns of special areas (face, hands, feet, perineum, genitalia, and major joints)
  - 3) Full thickness burns >5% TBSA burned
  - 4) Electrical burns
  - 5) Chemical burns
  - 6) Burns with associated inhalation injury
  - 7) Circumferential burns of limbs or chest
  - 8) Extremes of age (children and elderly)
  - 9) Pre-existing medical disorders which could complicate management and prolong recovery or effect mortality
  - 10) Associated trauma
- 

513

514 **Table 2: Schedule of events**

| Event forms               | Screening | 3 we<br>(2-4 we) | 6 we*<br>(5-7 we) | 3 mo<br>(11-15 we) | 6 mo<br>(6-7 mo) | 12 mo<br>(12-14 mo) |
|---------------------------|-----------|------------------|-------------------|--------------------|------------------|---------------------|
| Screening                 | X         |                  |                   |                    |                  |                     |
| Informed Consent          |           | X                |                   |                    |                  |                     |
| Patient characteristics   |           | X                |                   |                    |                  |                     |
| Injury characteristics    |           | X                |                   |                    |                  |                     |
| Radiology                 |           | X <sup>1</sup>   | X <sup>1</sup>    | X <sup>1</sup>     | X <sup>1</sup>   | X <sup>1</sup>      |
| Digital photo             |           | X <sup>1</sup>   | X <sup>1</sup>    | X <sup>1</sup>     | X <sup>1</sup>   | X <sup>1</sup>      |
| Treatment characteristics |           | X                | X                 | X                  | X                | X                   |
| Outcome details           |           | X                | X                 | X                  | X                | X                   |
| Adverse Events            |           | X                | X                 | X                  | X                | X                   |
| Clinical FU               |           | X                | X                 | X                  | X                | X                   |
| Health Care Consumption   |           | X                | X                 | X                  | X                | X                   |
| EQ-5D                     |           | X <sup>2</sup>   |                   | X                  | X                | X                   |
| POSAS                     |           |                  |                   | X                  | X                | X                   |
| Early withdrawal          |           | **               | **                | **                 | **               | **                  |

515 \*Optional visit; will only take place if wounds are not closed at three weeks.

516 <sup>1</sup>Only if treating surgeon requests these images.517 <sup>2</sup>Asking for EQ-5D pre-burn.

518 \*\* Only at time of withdrawal.

STROBE Statement—Checklist of items that should be included in reports of *cohort studies*

|                           | Item No | Recommendation                                                                                                                                                                                               | Page      |
|---------------------------|---------|--------------------------------------------------------------------------------------------------------------------------------------------------------------------------------------------------------------|-----------|
| <b>Title and abstract</b> | 1       | (a) Indicate the study's design with a commonly used term in the title or the abstract                                                                                                                       | 1         |
|                           |         | (b) Provide in the abstract an informative and balanced summary of what was done and what was found                                                                                                          | 4-5       |
| <b>Introduction</b>       |         |                                                                                                                                                                                                              |           |
| Background/rationale      | 2       | Explain the scientific background and rationale for the investigation being reported                                                                                                                         | 7-9       |
| Objectives                | 3       | State specific objectives, including any prespecified hypotheses                                                                                                                                             | 8         |
| <b>Methods</b>            |         |                                                                                                                                                                                                              |           |
| Study design              | 4       | Present key elements of study design early in the paper                                                                                                                                                      | 9         |
| Setting                   | 5       | Describe the setting, locations, and relevant dates, including periods of recruitment, exposure, follow-up, and data collection                                                                              | 9, 14-15  |
| Participants              | 6       | (a) Give the eligibility criteria, and the sources and methods of selection of participants. Describe methods of follow-up                                                                                   | 10-11, 14 |
|                           |         | (b) For matched studies, give matching criteria and number of exposed and unexposed                                                                                                                          | N.A.      |
| Variables                 | 7       | Clearly define all outcomes, exposures, predictors, potential confounders, and effect modifiers. Give diagnostic criteria, if applicable                                                                     | 11-14     |
| Data sources/measurement  | 8*      | For each variable of interest, give sources of data and details of methods of assessment (measurement). Describe comparability of assessment methods if there is more than one group                         | 11-14     |
| Bias                      | 9       | Describe any efforts to address potential sources of bias                                                                                                                                                    | 10        |
| Study size                | 10      | Explain how the study size was arrived at                                                                                                                                                                    | 15-16     |
| Quantitative variables    | 11      | Explain how quantitative variables were handled in the analyses. If applicable, describe which groupings were chosen and why                                                                                 | 16        |
| Statistical methods       | 12      | (a) Describe all statistical methods, including those used to control for confounding                                                                                                                        | 16-17     |
|                           |         | (b) Describe any methods used to examine subgroups and interactions                                                                                                                                          | 17        |
|                           |         | (c) Explain how missing data were addressed                                                                                                                                                                  | 16        |
|                           |         | (d) If applicable, explain how loss to follow-up was addressed                                                                                                                                               | 16        |
|                           |         | (e) Describe any sensitivity analyses                                                                                                                                                                        | N.A.      |
| <b>Results</b>            |         |                                                                                                                                                                                                              |           |
| Participants              | 13*     | (a) Report numbers of individuals at each stage of study—eg numbers potentially eligible, examined for eligibility, confirmed eligible, included in the study, completing follow-up, and analysed            | N.A.      |
|                           |         | (b) Give reasons for non-participation at each stage                                                                                                                                                         | N.A.      |
|                           |         | (c) Consider use of a flow diagram                                                                                                                                                                           | N.A.      |
| Descriptive data          | 14*     | (a) Give characteristics of study participants (eg demographic, clinical, social) and information on exposures and potential confounders                                                                     | N.A.      |
|                           |         | (b) Indicate number of participants with missing data for each variable of interest                                                                                                                          | N.A.      |
|                           |         | (c) Summarise follow-up time (eg, average and total amount)                                                                                                                                                  | N.A.      |
| Outcome data              | 15*     | Report numbers of outcome events or summary measures over time                                                                                                                                               | N.A.      |
| Main results              | 16      | (a) Give unadjusted estimates and, if applicable, confounder-adjusted estimates and their precision (eg, 95% confidence interval). Make clear which confounders were adjusted for and why they were included | N.A.      |

|                          |    |                                                                                                                                                                            |      |
|--------------------------|----|----------------------------------------------------------------------------------------------------------------------------------------------------------------------------|------|
|                          |    | (b) Report category boundaries when continuous variables were categorized                                                                                                  | N.A. |
|                          |    | (c) If relevant, consider translating estimates of relative risk into absolute risk for a meaningful time period                                                           | N.A. |
| Other analyses           | 17 | Report other analyses done—eg analyses of subgroups and interactions, and sensitivity analyses                                                                             | N.A. |
| <b>Discussion</b>        |    |                                                                                                                                                                            |      |
| Key results              | 18 | Summarise key results with reference to study objectives                                                                                                                   | N.A. |
| Limitations              | 19 | Discuss limitations of the study, taking into account sources of potential bias or imprecision. Discuss both direction and magnitude of any potential bias                 | N.A. |
| Interpretation           | 20 | Give a cautious overall interpretation of results considering objectives, limitations, multiplicity of analyses, results from similar studies, and other relevant evidence | 19   |
| Generalisability         | 21 | Discuss the generalisability (external validity) of the study results                                                                                                      | 19   |
| <b>Other information</b> |    |                                                                                                                                                                            |      |
| Funding                  | 22 | Give the source of funding and the role of the funders for the present study and, if applicable, for the original study on which the present article is based              | 23   |

\*Give information separately for exposed and unexposed groups.

**Note:** An Explanation and Elaboration article discusses each checklist item and gives methodological background and published examples of transparent reporting. The STROBE checklist is best used in conjunction with this article (freely available on the Web sites of PLoS Medicine at <http://www.plosmedicine.org/>, Annals of Internal Medicine at <http://www.annals.org/>, and Epidemiology at <http://www.epidem.com/>). Information on the STROBE Initiative is available at <http://www.strobe-statement.org>.
